# Supplementary material for: Efficacy of remdesivir in patients with COVID-19: a protocol for systematic review and meta-analysis of randomised controlled trials
Source: PubMed Central journal article supplement — BMJ Open. 2020 Jun 4;10(6):e039159. doi: 10.1136/bmjopen-2020-039159 (PMC7298683; doi:10.1136/bmjopen-2020-039159), 2020-06-04
Supplement: bmjopen-2020-039159.draft_revisions.pdf [file bmjopen-2020-039159.draft_revisions.pdf]

# BMJ Open

BMJ Open is committed to open peer review. As part of this commitment we make the peer review history of every article we publish publicly available.

When an article is published we post the peer reviewers' comments and the authors' responses online. We also post the versions of the paper that were used during peer review. These are the versions that the peer review comments apply to.

The versions of the paper that follow are the versions that were submitted during the peer review process. They are not the versions of record or the final published versions. They should not be cited or distributed as the published version of this manuscript.

BMJ Open is an open access journal and the full, final, typeset and author-corrected version of record of the manuscript is available on our site with no access controls, subscription charges or pay-per-view fees (<http://bmjopen.bmj.com>).

If you have any questions on BMJ Open's open peer review process please email [info.bmjopen@bmj.com](mailto:info.bmjopen@bmj.com)

# BMJ Open

## Efficacy of remdesivir versus placebo for the treatment of COVID-19: A protocol for systematic review and meta-analysis of randomized controlled trials

|                               |                                                                                                                                                                                                                                                                                                                                                                                                                                                                                                                                                                        |
|-------------------------------|------------------------------------------------------------------------------------------------------------------------------------------------------------------------------------------------------------------------------------------------------------------------------------------------------------------------------------------------------------------------------------------------------------------------------------------------------------------------------------------------------------------------------------------------------------------------|
| Journal:                      | <i>BMJ Open</i>                                                                                                                                                                                                                                                                                                                                                                                                                                                                                                                                                        |
| Manuscript ID                 | bmjopen-2020-039159                                                                                                                                                                                                                                                                                                                                                                                                                                                                                                                                                    |
| Article Type:                 | Protocol                                                                                                                                                                                                                                                                                                                                                                                                                                                                                                                                                               |
| Date Submitted by the Author: | 07-Apr-2020                                                                                                                                                                                                                                                                                                                                                                                                                                                                                                                                                            |
| Complete List of Authors:     | Gebrie, Desye; Center for Innovative Drug Development and Therapeutic Trials for Africa, College of Health Sciences, Addis Ababa University, Addis Ababa, Ethiopia, ; School of Pharmacy, College of Health Sciences, Mekelle University, Mekelle, Ethiopia, Getnet, Desalegn; Pharmacology and Toxicology Course and Research Team, Department of Pharmacy, College of Health Sciences, Adigrat University, Adigrat, Ethiopia Manyazewal, Tsegahun; Center for Innovative Drug Development and Therapeutic Trials for Africa , ; Ethiopian Public Health Association, |
| Keywords:                     | Clinical trials < THERAPEUTICS, VIROLOGY, Respiratory infections < THORACIC MEDICINE, Infection control < INFECTIOUS DISEASES                                                                                                                                                                                                                                                                                                                                                                                                                                          |
|                               |                                                                                                                                                                                                                                                                                                                                                                                                                                                                                                                                                                        |

SCHOLARONE™  
Manuscripts

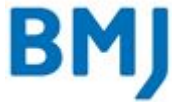

I, the Submitting Author has the right to grant and does grant on behalf of all authors of the Work (as defined in the below author licence), an exclusive licence and/or a non-exclusive licence for contributions from authors who are: i) UK Crown employees; ii) where BMJ has agreed a CC-BY licence shall apply, and/or iii) in accordance with the terms applicable for US Federal Government officers or employees acting as part of their official duties; on a worldwide, perpetual, irrevocable, royalty-free basis to BMJ Publishing Group Ltd ("BMJ") its licensees and where the relevant Journal is co-owned by BMJ to the co-owners of the Journal, to publish the Work in this journal and any other BMJ products and to exploit all rights, as set out in our [licence](#).

The Submitting Author accepts and understands that any supply made under these terms is made by BMJ to the Submitting Author unless you are acting as an employee on behalf of your employer or a postgraduate student of an affiliated institution which is paying any applicable article publishing charge ("APC") for Open Access articles. Where the Submitting Author wishes to make the Work available on an Open Access basis (and intends to pay the relevant APC), the terms of reuse of such Open Access shall be governed by a Creative Commons licence – details of these licences and which [Creative Commons](#) licence will apply to this Work are set out in our licence referred to above.

Other than as permitted in any relevant BMJ Author's Self Archiving Policies, I confirm this Work has not been accepted for publication elsewhere, is not being considered for publication elsewhere and does not duplicate material already published. I confirm all authors consent to publication of this Work and authorise the granting of this licence.

1  
2  
3 **Efficacy of remdesivir versus placebo for the treatment of COVID-19: A protocol for**  
4 **systematic review and meta-analysis of randomized controlled trials**  
5  
6

7 Desye Gebrie<sup>1,2</sup>, Desalegn Getnet<sup>3</sup>, Tsegahun Manyazewal<sup>1</sup>  
8  
9

10  
11  
12 <sup>1</sup>Center for Innovative Drug Development and Therapeutic Trials for Africa, College of Health  
13 Sciences, Addis Ababa University, Addis Ababa, Ethiopia

14 <sup>2</sup>School of Pharmacy, College of Health Sciences, Mekelle University, Mekelle, Ethiopia

15  
16 <sup>3</sup>Pharmacology and Toxicology Course and Research Team, Department of Pharmacy, College  
17 of Health Sciences, Adigrat University, Adigrat, Ethiopia  
18  
19  
20  
21  
22

23  
24 Correspondence: Desye Gebrie: [desye.gebrie@mu.edu.et](mailto:desye.gebrie@mu.edu.et). <sup>1</sup>[Center for Innovative Drug](#)  
25 [Development and Therapeutic Trials for Africa, College of Health Sciences, Addis Ababa](#)  
26 [University, Addis Ababa, Ethiopia](#); <sup>2</sup>[School of Pharmacy, College of Health Sciences, Mekelle](#)  
27 [University, Mekelle, Ethiopia](#). B Tel: (+251)1118787311, Fax: (+251) 115511079, P.O. Box  
28 9086, Addis Ababa, Ethiopia  
29  
30  
31  
32  
33

34 Co-authors' Email Address

35 Desalegn Getnet: [desget361@gmail.com](mailto:desget361@gmail.com)

36 Tsegahun Manyazewal: [tsegahunm@gmail.com](mailto:tsegahunm@gmail.com)  
37  
38  
39  
40  
41  
42  
43  
44  
45  
46  
47  
48  
49  
50  
51  
52  
53  
54  
55  
56  
57  
58  
59  
60

## Abstract

**Background:** In spite of the global containment on prevention efforts, the spread of coronavirus disease 2019 (COVID-19) is continuing to rise, with 1.1 million confirmed cases and 60,124 deaths recorded worldwide since 04 April 2020. The outbreak has a significant threat to international health and economy. At present, there is no approved vaccine or treatment for the disease, while efforts are underway. Remdesivir, a nucleotide-analogue antiviral drug developed for Ebola, is determined to prevent and stop infections with COVID-19, while results are yet controversial. Here, we aim to conduct a systematic review and meta-analysis of randomized controlled trials to compare the effectiveness of remdesivir and placebo in patients with COVID-19.

**Method and analysis:** We will search MEDLINE-PubMed, Embase, Cochrane Library, ClinicalTrials.gov, and Google scholar databases without restriction in year of publication. We will include randomized controlled trials that assessed the effectiveness of remdesivir versus placebo for patients confirmed with COVID-19. We will follow the Preferred Reporting Items for Systematic Review and Meta-Analysis (PRISMA 2015) guidelines for the design and reporting of the results. The primary endpoint will be time to clinical recovery. The secondary endpoints will be all cause mortality, discharged date, frequency of respiratory progression, and treatment-emergent adverse events. Two independent authors will perform study selection, data extraction, and methodology quality assessment. RevMan 5.3 software will be used for statistical analysis. Random/fixed effect model will be carried out to calculate mean differences for continuous outcomes and risk ratio for dichotomous outcomes between remdesivir and placebo.

**Ethics and dissemination:** This study does not require ethical approval, because no participant's data will be involved in this systematic review and meta-analysis. The findings of this study will be published in reputable and peer-reviewed journal.

**Registration:** This review protocol is submitted in PROSPERO database for registration and we will include the registration number in the revised version of the manuscript.

**Keywords:** 2019 novel coronavirus, 2019-nCoV, Coronavirus diseases 2019, COVID-19, SARS-cov-2, Remdesivir, Randomized Controlled Trials. Systematic review, Meta-analysis, protocol

## Strengths and limitations of this study

- This systematic review and meta-analysis will be derived from only randomized controlled trials which will increase the quality of evidences.
- This systematic review and meta-analysis will be derived from only randomized controlled trials which will reduce between study heterogeneity.
- Subgroup and sensitivity analysis will be carried out to identify possible reasons that may cause significant heterogeneity between studies.
- The use of Cochrane risk of bias tool to assess risk of bias for each included studies to extract and synthesize evidence based conclusions.
- One of the limitation of this study might be the restriction of trials published in English language.

## Introduction

Over the course of December 2019, the health authority of Wuhan City, Hubei province, China reported a cluster of pneumonia cases of unknown etiology [1]. The Chinese researcher rapidly isolated Severe Acute Respiratory Syndrome Coronavirus 2 (SARS-CoV-2) from a patient on 7 January 2020 and came out to genome sequencing of the SARS-CoV-2 [2]. On 9 January 2020, China's communicable diseases control authority announced that 2019 novel coronavirus (2019-nCoV) had been detected as the causative agent for the epidemics [3]. On 11 February 2020 World Health Organization officially named the disease as coronavirus disease 2019 (COVID-19). COVID-19 is caused by a novel  $\beta$ -coronavirus which is named as SARS-CoV-2. SARS-CoV-2 shares 79% sequence identity with Severe Acute Respiratory Syndrome Coronavirus (SARS-CoV) and Middle East Respiratory Syndrome Coronavirus (MERS-CoV) which caused a major outbreak since 2002 and 2012 in China and Saudi Arabia respectively [4-6].

In spite of the global containment and prevention efforts, the spread of COVID-19 is continuing to rise with 1.1 million confirmed cases and 60,124 deaths recorded worldwide since 04 April 2020. [7-8]. The outbreak of COVID-19 infection has a significant threat to international health and economy [9]. At present, there is no approved vaccine or treatment for COVID-19, so that identifying the drug treatment options as soon as possible is critical agenda to overcome the outbreak [10-11].

Despite the lack of approved drugs and vaccine for COVID-19, many scientists are endeavoring to find medicines specific to the virus and they have been looking into repurposing the already approved drugs. As of 29 March 2020, there has been 209 clinical trials registered in [clinicaltrials.gov](http://clinicaltrials.gov) and estimated to be over 500 [12]. Currently, several drugs such as remdesivir, hydroxychloroquine, chloroquine, Ritonavir+Lopinavir, Arbidol and interferon are undergoing randomized controlled trials (RCTs) to test their efficacy and safety for the treatment of COVID-19 in many countries [13-18]. Among these investigating drugs remdesivir showed promising results [18-19]. Remdesivir is nucleotide analog prodrug and shows broad spectrum antiviral activity against many RNA viruses including SARS-CoV-2 [20-21]. Remdesivir has been reported as a treatment of COVID-19 in United States, China and Italy [13,15, 22]. while results are yet controversial [9]. To bridge this gap, here we aim to conduct a systematic review and meta-analysis of RCTs to compare the effectiveness of remdesivir and placebo in patients with COVID-19.

## Methods

### Study registration

The protocol for this systematic review and meta-analysis is submitted in PROSPERO database for registration and we will include the registration number in the revised version of the manuscript.

### Data sources and searches

We will search MEDLINE/PubMed (<http://www.ncbi.nlm.nih.gov/pubmed/>), Embase (<http://www.embase.com/>), The Cochrane Library (<http://www.cochranelibrary.com/>), ClinicaTtrials.gov (<https://www.clinicaltrials.gov/>), and google scholar (<https://scholar.google.com/>) databases for completed studies that reported the efficacy of remdesivir versus placebo for patients with COVID-19. We will include randomized controlled trials that assessed the effectiveness of remdesivir versus placebo for patients with COIVID-19 without restriction on year of publication, but published in English language. The Medical Subject Headings (MeSH) and keywords we will used in different combinations using balloon operators will be 2019 novel coronavirus, 2019-nCov, coronavirus disease 2019, COVID-19, SARS-cov-2, remdesivir, nucleotide-analogue, antiviral drug and randomized controlled trials. All potentially eligible studies will be considered for this review, irrespective of the primary outcomes. Manual searching will be performed to find out additional eligible trials from the reference lists of key articles.

**Table 1:** Search strategy for the MEDILINE-PubMed database

|                       |     |                            |     |                                |
|-----------------------|-----|----------------------------|-----|--------------------------------|
| "Antiviral drug"      |     | "Coronavirus disease 2019" |     |                                |
| OR                    |     | OR                         |     |                                |
| "Nucleotide-analogue" |     | "COVID-19"                 |     | "Randomized controlled trials" |
| OR                    | AND | OR                         | AND | OR                             |
| "Remdesivir"          |     | "SARS-CoV-2"               |     | "RCTs"                         |
|                       |     | OR                         |     |                                |
|                       |     | "2019 novel coronavirus"   |     |                                |
|                       |     | OR                         |     |                                |
|                       |     | "2019-nCoV"                |     |                                |



## Eligibility

Study eligibility criteria for this systematic review and meta-analysis will be in accordance with Participants, Intervention, Comparison, Outcomes and Study designs (PICOS) descriptions [23].

**Population:** The population will be patients confirmed with COVID-19 and with or without other co-morbid conditions in all age groups.

**Intervention:** The intervention/ experimental group will be any dose of remdesivir

**Comparator:** The comparator group will be placebo/ standard of care

**Outcomes:** The primary endpoints will be time to clinical recovery and proportion of participants relieved from clinical symptoms defined at the time (in hours) from initiation of the study treatment. The secondary endpoints will be all cause mortality, discharged date, frequency of respiratory progression, oxygen saturation and treatment-emergent adverse events in each groups.

**Study design:** Only RCTs evaluating effectiveness of remdesivir versus placebo for patients with COVID-19 will be included.

## Study selection

The title and abstract of all searched studies will be examined by two independent review authors. From the title and abstract of all studies identified by the database search, those studies duplicated and not meet the eligibility criteria will be excluded. The full texts of the remaining studies will be further reviewed. Disagreements will be resolved by consensus and if persisted, we will be arbitrated through discussion with a third review author. We will follow the Preferred Reporting Items for Systematic Review and Meta-Analysis (PRISMA 2015) guidelines [24] for the design and reporting of the results.

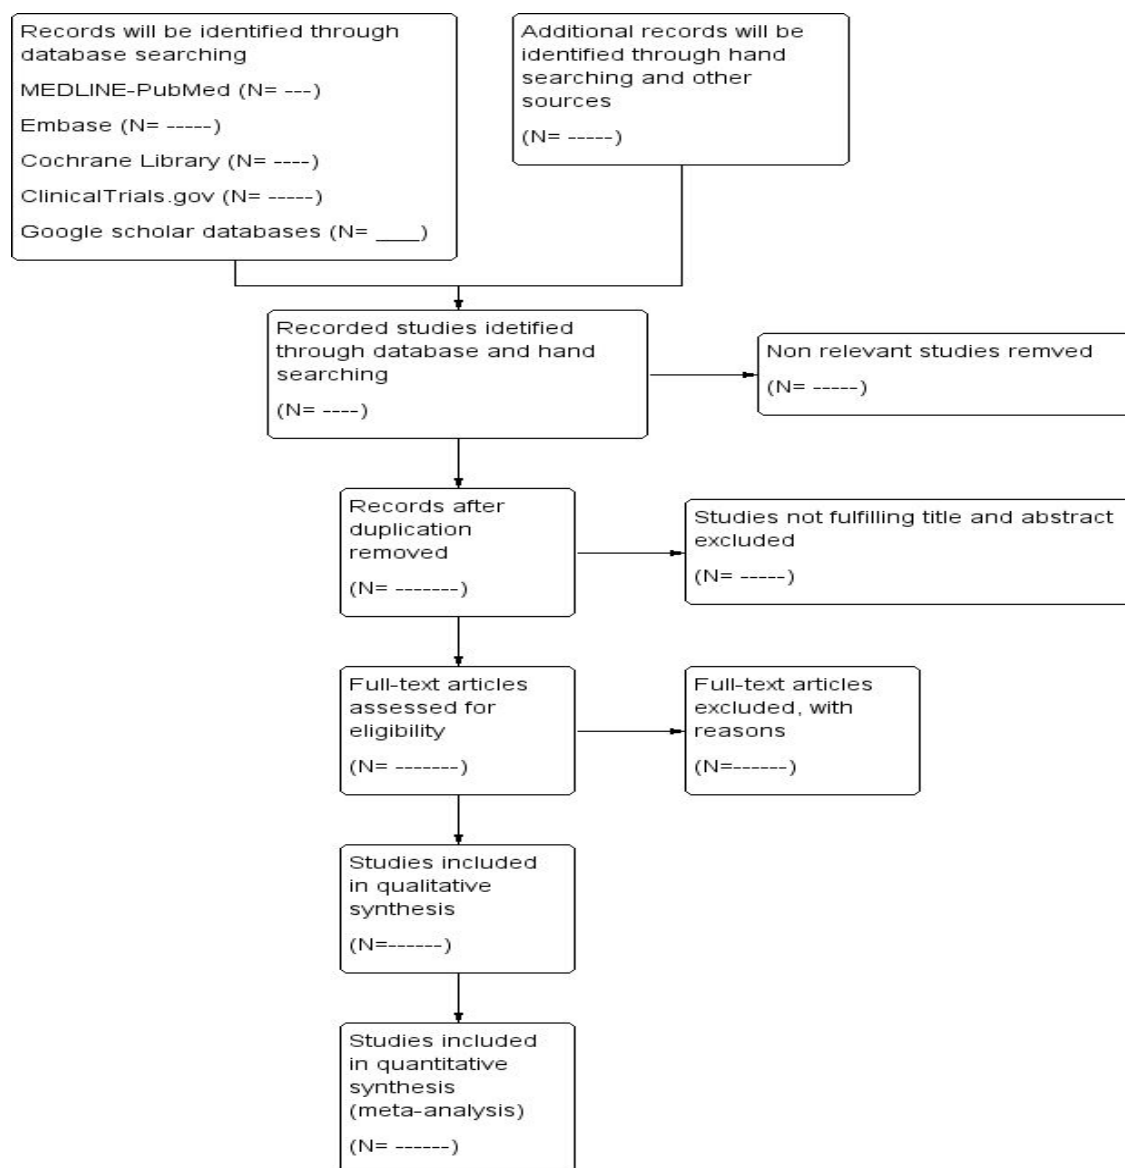

41 **Figure 1:** Preferred Reporting Items for Systematic Reviews and Meta-Analyses flow diagram of  
42 the study selection process and search results  
43

#### 44 **Data extraction**

45  
46  
47 Two authors will independently extract data according to the pre-designed data extraction tool.  
48 The following data will be extracted from each included RCTs: first author, year of publication,  
49 funding information, setting, mean age of the participant, interventions, comparators, doses,  
50 number of participants randomized, duration of treatment, all primary, secondary and other  
51 outcome measurements. If any disagreement regarding the data extraction between the two review  
52 authors exist, the third author will be consulted and consensus will be made through discussion.  
53  
54  
55  
56  
57

**Table 2:** characteristics of RCTs included in the systematic review and/or meta-analysis

| 1 <sup>st</sup> author<br>(year) | Country | Age<br>(year) | No.<br>of<br>pts | Intervention       | Comparator   | Follow<br>-up<br>(days) | Outcomes                                                                                                                                                                             | Results    |         |
|----------------------------------|---------|---------------|------------------|--------------------|--------------|-------------------------|--------------------------------------------------------------------------------------------------------------------------------------------------------------------------------------|------------|---------|
|                                  |         |               |                  |                    |              |                         |                                                                                                                                                                                      | Remdesivir | Placebo |
|                                  |         |               |                  | Remdesivir<br>(n=) | Placebo (n=) |                         | Time to clinical<br>recovery<br>No. of patients<br>relieved from<br>symptoms<br>Frequency of<br>respiratory<br>progression<br>Oxygen<br>saturation<br>Adverse events<br>Death events |            |         |

### Assessment of risk of bias

The Cochrane risk of bias tool [25] will be used to assess the risk of bias for each included study. The risk of bias of each trial will be judged by two independent review authors as “Low”, “Unclear”, or “High” based on the critical domains, including random sequence generation, allocation concealment, blinding, incomplete outcome data, selective reporting and other source of biases. Disagreements will be resolved by discussion among all authors. If the disagreements cannot be resolved through discussion, an arbiter will make the final decision.

### Statistical analysis

Meta-analysis will be carried out using the computer software packages RevMan 5.3 [26]. Continuous outcome data will be reported using a mean difference (MD) and a 95% confidence interval (CI). Binary outcome data will be summarized using risk ratio (RR) and 95% CI. Mantel-Haenszel method [27] will be used to pool effect estimates of dichotomous outcomes and inverse variance for continuous outcomes. Cochrane Q test [28] will be used to assess heterogeneity between studies, and  $I^2$  testing [29] will be done to quantify heterogeneity between studies, with values > 50% representing moderate-to-high heterogeneity. If heterogeneity between study is acceptable, a fixed-effect model will be used to pool the data. On the other hand, if unacceptable heterogeneity detected or if the number of studies are small, a random-effect model will be used to pool the data [30]. Subgroup analysis will be carried out to identify possible reasons that may

1  
2  
3 cause significant heterogeneity between studies. If we get acceptable heterogeneity after the  
4 subgroup analysis, we will perform meta-analysis. Otherwise, we will do a narrative description.  
5 Sensitivity analysis will be conducted to see the robustness of pooled data by removing low quality  
6 studies. Statistical analysis with a p-value < 0.05 will be considered statistically significant.  
7  
8  
9

### 10 **Addressing missing data**

11  
12  
13 When individual participant's data are initially unavailable, we will review the original source,  
14 and/or published trial reports and we will contact the authors to obtain clarification for these data.  
15  
16

### 17 **Reporting bias**

18  
19 We will conduct funnel plot and Egger test to check any possible reporting bias if a sufficient  
20 number of included studies (at least 10 trials) are available in this study [31].  
21  
22  
23

### 24 **Ethics and dissemination**

25  
26  
27 This study does not require ethical approval, because no participant's data will be involved in this  
28 systematic review and meta-analysis. The findings of this study will be published in reputable and  
29 peer-reviewed journal.  
30  
31  
32

### 33 **Abbreviations**

34  
35  
36 2019-nCoV = 2019 novel Coronavirus, COVID-19 = Coronavirus Disease-2019, SARS = Sever  
37 Acute Respiratory Syndrome, RCTs = Randomized Controlled Trials, SARS-CoV-2 = Sever  
38 Acute Respiratory Syndrome Coronavirus-2, MERS = Middle East Respiratory Syndrome  
39  
40  
41  
42

### 43 **Declarations**

#### 44 **Competing interests**

45  
46  
47 All review authors declare that they have no competing interests. The funder has not any role in  
48 the design, syntheses and report of the study.  
49  
50  
51

#### 52 **Funding**

53  
54 This study is supported by Center for Innovative Drug Development and Therapeutic Trials for  
55 Africa (CDT-Africa), College of Health Sciences, Addis Ababa University.  
56  
57  
58

### Authors' contributions

DG (first author) conceived the study, developed the study criteria, searched the literature, wrote the protocol and drafting the manuscript. DG (second author) conducted the preliminary search and TM revised the manuscript. All authors have read and approved the manuscript.

### Acknowledgement

The authors would like to acknowledge Center for Innovative Drug Development and Therapeutic Trials for Africa (CDT-Africa), College of Health Sciences, Addis Ababa University which is funding this study.

### References

1. Wuhan City Health Committee. Wuhan Municipal Health and Health Commission's briefing on the current pneumonia epidemic situation in our city 2019 [updated 14 January 2020]. Available from: <http://wjw.wuhan.gov.cn/front/web/showDetail/2019123108989>
2. Lu R, Zhao X, Li J et al. Genomic characterisation and epidemiology of 2019 novel coronavirus: implications for virus origins and receptor binding. *Lancet*. 2020; 395:565–74.
3. News X. Experts claim that a new coronavirus is identified in Wuhan 2020 [14 January 2020]. Available from: [http://www.xinhuanet.com/2020-01/09/c\\_1125438971.htm](http://www.xinhuanet.com/2020-01/09/c_1125438971.htm)
4. Wu F, Zhao S, Yu B et al. Complete genome characterization of a novel coronavirus associated with severe human respiratory disease in Wuhan, China. *bioRxiv* 2020; [Epub ahead of print].
5. Zhou P, Yang XL, Wang XG et al. Discovery of a novel coronavirus associated with the recent pneumonia outbreak in humans and its potential bat origin. *bioRxiv* 2020; [Epub ahead of print].
6. Lu R, Zhao X, Li J et al. Genomic characterisation and epidemiology of 2019 novel coronavirus: implications for virus origins and receptor binding. *Lancet* 2020; [Epub ahead of print].
7. Sohrabi C, Alsafi Z, O'Neill N et al. World health organization declares global emergency: A review of the 2019 novel coronavirus (COVID-19). *Int J Surg*. 2020; 76:71-76.
8. Worldometer. Coronavirus update (Live). <https://www.worldometers.info/coronavirus/>

- 1  
2  
3 9. Zhang C, Huang S, Zheng F et al. Controversial treatments: An update understanding of the  
4 coronavirus Diseases 2019. *J Med Virol.* 2020; DOI:10.1002/jmv.25788  
5
- 6 10. Hongzhou Lu. Drug treatment options for the 2019-new coronavirus (2019-nCoV).  
7 *BioScience Trends.* 2020; 14:69-71.  
8
- 9 11. Li G & De Clercq E. Therapeutic options for the 2019 novel coronavirus (2019-nCoV).  
10 [www.nature.com](http://www.nature.com). 2020; 19:149-150  
11
- 12 12. US National Library of Medicine. Clinical Trials Registry 2020 [updated 29 March 2020];  
13 Available from: <https://clinicaltrials.gov/ct2/results?term=covid+19+&Search=Search>.  
14
- 15 13. Center for disease control and prevention. Information for Clinicians on Therapeutic  
16 Options for COVID-19 Patients 2020 [updated 21 March 2020; cited 2020. Available from:  
17 <https://www.cdc.gov/coronavirus/2019-ncov/hcp/therapeutic-options.html>.  
18
- 19 14. The First Affiliated Hospital Zhejiang University School of Medicine. Handbook of  
20 COVID-19 Prevention and Treatment. [Hand Book]. In press 2020.  
21
- 22 15. Li H, Wang Y, Xu J, Cao B. Potential antiviral therapeutics for 2019 Novel Coronavirus.  
23 *Chinese journal of tuberculosis and respiratory diseases.* 2020; 43:E002-E.  
24
- 25 16. Paules CI, Marston HD, Fauci AS. Coronavirus Infections-More Than Just the Common  
26 Cold. *JAMA.* 2020.  
27
- 28 17. Devlin H and Sample I. Hopes rise over experimental drug's effectiveness against  
29 coronavirus. *The Guardian.* 2020; 10 March 2020.  
30
- 31 18. Dong L, Hu S, Gao J. Discovering drugs to treat coronavirus disease 2019 (COVID-19).  
32 *Drug Discoveries & Therapeutics.* 2020; 14:58-60.  
33
- 34 19. Chan KW, Wong VT, Tang SC. COVID-19: An update on the Epidemiological, Clinical,  
35 Preventive and Therapeutic Evidence and Guidelines of Integrative Chinese-Western  
36 Medicine for the Management of 2019 Novel Coronavirus Disease. *Am J Chin Med.* 2020;  
37 1-26.  
38
- 39 20. Agostini ML, Andres EL, Sims AC et al. Coronavirus susceptibility to the antiviral  
40 remdesivir (gs-5734) is mediated by the viral polymerase and the proofreading  
41 exoribonuclease. *mBio.* 2018; 9: e00221-18. <https://doi.org/10.1128/mBio.00221-18>  
42
- 43 21. Guo YR, Cao QD, Hong ZS et al. The origin, transmission and clinical therapies on  
44 coronavirus disease 2019 (COVID-19) outbreak – an update on the status. *Military Medical  
45 Research.* 2020; 7:11. <https://doi.org/10.1186/s40779-020-00240-0>  
46  
47  
48  
49  
50  
51  
52  
53  
54  
55  
56  
57

- 1
  - 2
  - 3
  - 4
  - 5
  - 6
  - 7
  - 8
  - 9
  - 10
  - 11
  - 12
  - 13
  - 14
  - 15
  - 16
  - 17
  - 18
  - 19
  - 20
  - 21
  - 22
  - 23
  - 24
  - 25
  - 26
  - 27
  - 28
  - 29
  - 30
  - 31
  - 32
  - 33
  - 34
  - 35
  - 36
  - 37
  - 38
  - 39
  - 40
  - 41
  - 42
  - 43
  - 44
  - 45
  - 46
  - 47
  - 48
  - 49
  - 50
  - 51
  - 52
  - 53
  - 54
  - 55
  - 56
  - 57
  - 58
  - 59
  - 60
22. Holshue ML, DeBolt C, Lindquist S, et al. First case of 2019 novel coronavirus in the United States. *N Engl J Med*. 2020; <https://doi.org/10.1056/NEJMoa2001191> [Epub ahead of print].
23. Guyatt GH, Oxman AD, Kunz R, et al. GRADE guidelines: 2. Framing the questions and deciding on important outcomes. *J Clin Epidemiol*. 2011; 64:395-400.
24. Shamseer L, Moher D, Clarke M, et al. Preferred reporting items for systematic review and meta-analysis protocols (PRISMA-P) 2015: Elaboration and Explanation. *BMJ*. 2015; 350:g7647.
25. Higgins JPT. *Cochrane handbook for systematic reviews of interventions*, 2nd ed. John Wiley & Sons; 2019.
26. Review Manager (RevMan) [Computer program]. Version 5.3. Copenhagen: The Nordic Cochrane Centre, The Cochrane Collaboration, 2014.
27. Suesse T, Liu I. Mantel–Haenszel estimators of a common odds ratio for multiple response data. *Statistical Methods & Applications*. 2019; 28:57-76.
28. Higgins JP, Thompson SG, Deeks JJ et al. Measuring inconsistency in meta-analyses. *BMJ*. 2003; 327:557-60.
29. Higgins JP, Thompson SG. Quantifying heterogeneity in a meta-analysis. *Stat Med*. 2002; 21:1539-58.
30. Bell A, Fairbrother M, Jones K. Fixed and random effects models: making an informed choice. *Quality & Quantity*. 2019; 53:1051-74.
31. Sterne JAC, Egger M, Moher D. Chapter 10: Addressing reporting biases. 2011. In: *Cochrane Handbook for Systematic Reviews of Interventions Version 510* (updated March 2011) [Internet]. The Cochrane Collaboration, 2011. Available from [www.cochrane-handbook.org](http://www.cochrane-handbook.org).

# BMJ Open

## Efficacy of remdesivir in patients with COVID-19: A protocol for systematic review and meta-analysis of randomized controlled trials

|                                 |                                                                                                                                                                                                                                                                                                                                                                                                                                                                                                                                                                        |
|---------------------------------|------------------------------------------------------------------------------------------------------------------------------------------------------------------------------------------------------------------------------------------------------------------------------------------------------------------------------------------------------------------------------------------------------------------------------------------------------------------------------------------------------------------------------------------------------------------------|
| Journal:                        | <i>BMJ Open</i>                                                                                                                                                                                                                                                                                                                                                                                                                                                                                                                                                        |
| Manuscript ID                   | bmjopen-2020-039159.R1                                                                                                                                                                                                                                                                                                                                                                                                                                                                                                                                                 |
| Article Type:                   | Protocol                                                                                                                                                                                                                                                                                                                                                                                                                                                                                                                                                               |
| Date Submitted by the Author:   | 23-Apr-2020                                                                                                                                                                                                                                                                                                                                                                                                                                                                                                                                                            |
| Complete List of Authors:       | Gebrie, Desye; Center for Innovative Drug Development and Therapeutic Trials for Africa, College of Health Sciences, Addis Ababa University, Addis Ababa, Ethiopia, ; School of Pharmacy, College of Health Sciences, Mekelle University, Mekelle, Ethiopia, Getnet, Desalegn; Pharmacology and Toxicology Course and Research Team, Department of Pharmacy, College of Health Sciences, Adigrat University, Adigrat, Ethiopia Manyazewal, Tsegahun; Center for Innovative Drug Development and Therapeutic Trials for Africa , ; Ethiopian Public Health Association, |
| <b>Primary Subject Heading</b>: | Respiratory medicine                                                                                                                                                                                                                                                                                                                                                                                                                                                                                                                                                   |
| Secondary Subject Heading:      | Respiratory medicine, Infectious diseases                                                                                                                                                                                                                                                                                                                                                                                                                                                                                                                              |
| Keywords:                       | Clinical trials < THERAPEUTICS, VIROLOGY, Respiratory infections < THORACIC MEDICINE, Infection control < INFECTIOUS DISEASES                                                                                                                                                                                                                                                                                                                                                                                                                                          |
|                                 |                                                                                                                                                                                                                                                                                                                                                                                                                                                                                                                                                                        |

SCHOLARONE™  
Manuscripts





I, the Submitting Author has the right to grant and does grant on behalf of all authors of the Work (as defined in the below author licence), an exclusive licence and/or a non-exclusive licence for contributions from authors who are: i) UK Crown employees; ii) where BMJ has agreed a CC-BY licence shall apply, and/or iii) in accordance with the terms applicable for US Federal Government officers or employees acting as part of their official duties; on a worldwide, perpetual, irrevocable, royalty-free basis to BMJ Publishing Group Ltd ("BMJ") its licensees and where the relevant Journal is co-owned by BMJ to the co-owners of the Journal, to publish the Work in this journal and any other BMJ products and to exploit all rights, as set out in our [licence](#).

The Submitting Author accepts and understands that any supply made under these terms is made by BMJ to the Submitting Author unless you are acting as an employee on behalf of your employer or a postgraduate student of an affiliated institution which is paying any applicable article publishing charge ("APC") for Open Access articles. Where the Submitting Author wishes to make the Work available on an Open Access basis (and intends to pay the relevant APC), the terms of reuse of such Open Access shall be governed by a Creative Commons licence – details of these licences and which [Creative Commons](#) licence will apply to this Work are set out in our licence referred to above.

Other than as permitted in any relevant BMJ Author's Self Archiving Policies, I confirm this Work has not been accepted for publication elsewhere, is not being considered for publication elsewhere and does not duplicate material already published. I confirm all authors consent to publication of this Work and authorise the granting of this licence.

1  
2  
3 **Efficacy of remdesivir in patients with COVID-19: A protocol for systematic review and**  
4 **meta-analysis of randomized controlled trials**  
5  
6

7 Desye Gebrie<sup>1,2</sup>, Desalegn Getnet<sup>3</sup>, Tsegahun Manyazewal<sup>1</sup>  
8  
9

10  
11  
12 <sup>1</sup>Center for Innovative Drug Development and Therapeutic Trials for Africa, College of Health  
13 Sciences, Addis Ababa University, Addis Ababa, Ethiopia  
14

15  
16 <sup>2</sup>School of Pharmacy, College of Health Sciences, Mekelle University, Mekelle, Ethiopia  
17

18  
19 <sup>3</sup>Pharmacology and Toxicology Course and Research Team, Department of Pharmacy, College of  
20 Health Sciences, Adigrat University, Adigrat, Ethiopia  
21  
22

23  
24  
25 Correspondence: Desye Gebrie: [desye.gebrie@mu.edu.et](mailto:desye.gebrie@mu.edu.et). <sup>1</sup>[Center for Innovative Drug](#)  
26 [Development and Therapeutic Trials for Africa, College of Health Sciences, Addis Ababa](#)  
27 [University, Addis Ababa, Ethiopia](#); <sup>2</sup>[School of Pharmacy, College of Health Sciences, Mekelle](#)  
28 [University, Mekelle, Ethiopia](#). B Tel: (+251)1118787311, Fax: (+251) 115511079, P.O. Box 9086,  
29 Addis Ababa, Ethiopia  
30  
31  
32  
33  
34  
35  
36

37 Co-authors' Email Address

38  
39 Desalegn Getnet: [desget361@gmail.com](mailto:desget361@gmail.com)  
40

41 Tsegahun Manyazewal: [tsegahunm@gmail.com](mailto:tsegahunm@gmail.com)  
42  
43  
44  
45  
46  
47  
48  
49  
50  
51  
52  
53  
54  
55  
56  
57  
58  
59  
60

## Abstract

**Background:** Despite global containment measures to fight the coronavirus disease 2019 (COVID-19), the pandemic continued to rise, resulting in 2.6 million confirmed cases and 185,061 deaths worldwide as of 23 April 2020. Yet, there are no approved vaccines or drugs to make the disease less deadly, while efforts are underway. Remdesivir, a nucleotide-analogue antiviral drug developed for Ebola, is determined to prevent and stop infections with COVID-19, while results are yet controversial. Here, we aim to conduct a systematic review and meta-analysis of randomized controlled trials to evaluate the efficacy of remdesivir in patients with COVID-19.

**Method and analysis:** We will search MEDLINE-PubMed, Embase, Cochrane Library, ClinicalTrials.gov, and Google scholar databases for articles published as of 01 May 2020 and we will complete the study on 01 July 2020. We will follow the Preferred Reporting Items for Systematic Review and Meta-Analysis (PRISMA-P) 2015 guidelines for the design and reporting of the results. We will include randomized controlled trials that assessed the efficacy of remdesivir versus placebo or standard of care. The primary endpoint will be time to clinical recovery. The secondary endpoints will be all-cause mortality, discharged date, frequency of respiratory progression, and treatment-emergent adverse events. RevMan 5.3 software will be used for statistical analysis. Random effect model will be carried out to calculate mean differences for continuous outcome data and risk ratio for dichotomous outcome data between remdesivir and placebo or standard of care.

**Ethics and dissemination:** There are no ethical considerations associated with this study as we will use publicly available data from previously published studies. We plan to publish results in open-access peer-reviewed journals and present at international and national conferences.

**PROSPERO registration number:** CRD42020177953.

**Keywords:** coronavirus disease 2019; COVID-19; 2019 novel coronavirus; 2019-nCoV; remdesivir; treatment; randomized controlled trials; systematic review; meta-analysis; protocol.

## Strengths and limitations of this study

- This will be the first systematic review and meta-analysis to evaluate the efficacy of remdesivir for COVID-19, which is a newly originated deadly disease.
- Its compliance with the Preferred Reporting Items for Systematic reviews and Meta-Analyses for Protocols 2015 (PRISMA-P 2015) will ensure the quality of reporting.
- The use of a combination of multiple electronic databases will include all eligible articles and provide accurate conclusions.
- The use of rigorous subgroup and sensitivity analysis will identify possible reasons that may cause significant heterogeneity between studies.
- Its singular focus on one antiviral treatment may preclude decision making and calls for network meta-analyses once trial results are made available.

## Introduction

Coronavirus diseases 2019 (COVID-19) is caused by a novel  $\beta$ -coronavirus which is named as SARS-CoV-2. SARS-CoV-2 shares 79% sequence identity with Severe Acute Respiratory Syndrome Coronavirus (SARS-CoV) and Middle East Respiratory Syndrome Coronavirus (MERS-CoV) which caused a major outbreak since 2002 and 2012 in China and Saud Arabia respectively [1-3]. Despite global containment measures to fight the disease, the pandemic continued to rise, resulting in 2.6 million confirmed cases and 185,061 deaths worldwide as of 23 April 2020 [4,5]. The outbreak of COVID-19 infection has a significant threat to international health and the economy [6]. Yet, there are no approved vaccines or drugs to make the disease less deadly; implying that therapeutic options are critical issues to overcome the outbreak [7-8].

Studies are strongly underway to discover rapidly drug candidates for COVID-19, and studies are looking into repurposing drugs that have been used for the treatment of other diseases. As of 29 March 2020, there were 209 clinical trials registered in ClinicalTrials.gov for COVID-19 therapeutic studies and this number is estimated to go over 500 [9]. Currently, several drugs including remdesivir, hydroxychloroquine, chloroquine, Ritonavir+Lopinavir, Arbidol, and interferon are under randomized controlled trials (RCTs) for efficacy and/or safety evaluations in patients with COVID-19 in different countries [10-15]. Remdesivir is among these investigational drugs and some studies reported promising results [15-16]. Remdesivir is a nucleotide analogue intravenous prodrug developed by Gilead Sciences, Inc., an American biopharmaceutical company, for treatment of Ebola virus during the 2014 Ebola outbreak in Western Africa. Remdesivir shows broad-spectrum antiviral activity against many RNA viruses including SARS-CoV-2 through blocking RNA polymerase thereby terminating RNA transcription. A recent study led by the US National Institutes of Health (NIH) that involved two groups of six rhesus macaque experiment monkeys, with one group treated with remdesivir, revealed a significantly lowered COVID-19 disease progression due to remdesivir [17]. According to a recent report of the U.S Centers for Disease Control and Prevention (CDC), in vitro and cell culture studies demonstrated broad-spectrum activity of remdesivir against coronavirus [18]. Nucleoside analogues such as remdesivir can have multiple mechanisms of action, including lethal mutagenesis, obligate or nonobligate chain termination, and perturbation of natural nucleotide triphosphate pools via inhibition of nucleotide biosynthesis [19-20]. Remdesivir was among the first treatments used in

1  
2  
3 China as the outbreak emerges and it has been reported as potential treatment options for COVID-  
4 19 in the United States, China, and Italy [10, 12, 21]. Some completed trials have evaluated  
5 remdesivir as a treatment option for COVID-19, while their results are controversial [6]. Thus, the  
6 proposed systematic review and meta-analysis of RCTs aims to synthesize existing evidence on  
7 the efficacy of remdesivir in patients with COVID-19.  
8  
9  
10  
11

## 12 **Methods**

13  
14  
15 We will conduct a systematic review and meta-analysis that will comply with the Preferred  
16 Reporting Items for Systematic Review and Meta-Analysis (PRISMA-P) 2015 guidelines for the  
17 design and reporting of the results [22] (see checklist in Additional file 1). The protocol has been  
18 registered at PROSPERO database, ID: CRD42020177953 [23].  
19  
20  
21  
22

### 23 **Data sources and searches**

24  
25 We will search MEDLINE/PubMed (<http://www.ncbi.nlm.nih.gov/pubmed/>), Embase  
26 (<http://www.embase.com/>), The Cochrane Library (<http://www.cochranelibrary.com/>),  
27 ClinicaTtrials.gov (<https://www.clinicaltrials.gov/>), and google scholar  
28 (<https://scholar.google.com/>) databases for primary articles published as of 01 May 2020 and we  
29 will complete the study by 01 July 2020. We will perform hand search from the reference lists of  
30 a key articles to identify eligible RCTs and supplement the searching. We will include all potential  
31 RCTs that evaluated the efficacy of remdesivir versus placebo or standard of care in patients with  
32 COVID-19 with no limitations on the geographical location of studies but published in English-  
33 language. We will do a rigorous search strategy using the key words including 2019 novel  
34 coronavirus, 2019-nCov, coronavirus disease 2019, COVID-19, SARS-cov-2, severe acute  
35 respiratory syndrome-coronavirus-2, remdesivir, nucleotide-analogue, antiviral agents,  
36 randomized controlled trials and RCTs. Table 1 summarizes the search strategy that we will  
37 applied in PubMed, while details of this strategy that we will also adapt for other databases'  
38 searches is described in Additional file 2 (Table 1).  
39  
40  
41  
42  
43  
44  
45  
46  
47  
48  
49  
50  
51  
52  
53  
54  
55  
56  
57  
58  
59  
60

**Table 1:** Search strategy for the MEDLINE-PubMed database

|                       |     |                                                      |     |                                      |
|-----------------------|-----|------------------------------------------------------|-----|--------------------------------------|
| “Antiviral agents”    |     | “Coronavirus disease 2019”                           |     |                                      |
| OR                    |     | OR                                                   |     |                                      |
| “Nucleotide-analogue” |     | “COVID-19”                                           |     | “Randomized<br>controlled<br>trials” |
|                       | AND | OR                                                   | AND | OR                                   |
| “Remdesivir”          |     | “Severe acute respiratory<br>syndrome-coronavirus-2” |     | “RCTs”                               |
|                       |     | OR                                                   |     |                                      |
|                       |     | “SARS-Cov-2”                                         |     |                                      |
|                       |     | OR                                                   |     |                                      |
|                       |     | “2019 novel coronavirus”                             |     |                                      |
|                       |     | OR                                                   |     |                                      |
|                       |     | “2019-nCoV”                                          |     |                                      |

### Eligibility criteria

We will formulate our participant’s eligibility criteria using PICOS (participants, interventions, comparison, outcomes, and study designs) model [24].

- Participants
  - Patients with confirmed COVID-19
  - Men and/or women of any age
  - At any clinical stage of the disease, thus mild, moderate or severe/critical case
  - With or without other co-morbid conditions
- Intervention
  - Remdesivir of any dose.
- Comparator
  - Placebo or standard of care.
- Outcomes/endpoints
  - Primary endpoints
    - Time to clinical recovery
    - Proportion of participants relieved from clinical symptoms defined at the time (in hours) from initiation of the study treatment

- Secondary endpoints
  - All-cause mortality
  - Discharged date
  - Frequency of respiratory progression
  - Oxygen saturation
  - Treatment-emergent adverse events
- Study design
  - Only RCTs evaluating the efficacy of remdesivir versus placebo and/or standard of care in patients with COVID-19

### Study selection

All the retrieved papers will be transferred to Endnote 7 and duplicates will be removed. Two investigators will independently assess the title and abstract of all the retrieved papers based on the eligibility criteria. The two investigators will independently evaluate the full texts. Disagreements between the two investigators will settle through discussion and if persisted, the third investigator will involve as arbitrator. Figure 1 summarizes the design that we will use to report the study result in line with the PRISMA -P 2015 guidelines (Figure 1).

### Figure 1: PRISMA-P flow diagram of the study

### Data extraction

Two authors will independently extract data according to the pre-designed data extraction tool. The following data will be extracted from each included RCTs

- First author,
- Year of publication,
- Study country
- Funding information
- Patient characteristics (mean age of the participant, sex, co-morbid conditions, number of comorbidities, symptom severity),
- Interventions (remdesivir, dose of remdesivir and route of administration)
- Comparators (placebo, standard of care),



- Number of participants randomized in each group,
- Treatment follow-up period,
- Outcomes (primary, secondary and other outcomes)

### **Assessment of risk of bias**

The Cochrane risk of bias tool [25] will be used to assess the risk of bias for each included study. The risk of bias of each trial will be judged by two independent investigators as “Low”, “Some concerns”, or “High” based on the critical domains, including bias arising from the randomization process, bias due to deviations from intended interventions, bias due to missing outcome data, bias in measurement of the outcome and bias in selection of the reported result. Disagreements will be resolved by discussion among the two investigators. If the disagreements persist, the third investigator will chip in as an arbitrator.

### **Statistical analysis**

All statistical analyses will be carried out using the computer software packages RevMan 5.3 [26]. Mean differences (MDs) with 95% confidence intervals (CIs) will be used to measure the effects of treatment for continuous outcome data. We will convert other forms of data into MDs using standard conversion formula. For outcome variables reported in different scales, we will use standard mean differences (SMDs) with 95% CIs. The treatment effect of binary outcome data will be summarized using risk ratios (RRs) with 95% CIs. Other binary outcome data will be converted into RRs. Mantel-Haenszel method [27] will be used to pool effect estimates of dichotomous outcomes and inverse variance for continuous outcomes. Cochrane Q test [28] will be used to assess heterogeneity between studies, and  $I^2$  testing [29] will be done to quantify heterogeneity between studies, with values  $> 50\%$  representing moderate-to-high heterogeneity. A random-effect model will be used to pool the data [30]. Subgroup analysis will be carried out between studies with different duration of follow-up, age of participants, severity of the disease, comorbidities, settings, and quality of studies for risk of bias. Following the subgroup analysis, we will look at the data for heterogeneity, and if acceptable, we will perform a meta-analysis. If the data is heterogeneous, we will do a narrative description of findings. To see the robustness of pooled data, sensitivity analysis will be conducted between low and high risk of bias, and with or without biased studies.. We will use the GRADEprofiler software from Cochrane Systematic Reviews to assess the quality of evidence per outcome and ultimately to create a summary of findings table and

1  
2  
3 evidence profile. All statistical analysis with a p-value  $< 0.05$  will be considered statistically  
4 significant.  
5

### 6 7 **Addressing missing data**

8  
9 When individual participant's data are initially unavailable, we will review the original source,  
10 and/or published trial reports, and we will contact the authors to obtain clarification for these data.  
11  
12

### 13 14 **Reporting bias**

15  
16 We will conduct funnel plot and Egger test to check any possible reporting bias if a sufficient  
17 number of included studies (at least 10 trials) are available in this study [31].  
18  
19

### 20 21 **Patient and public involvement**

22  
23 Patients and public will not be involved in this systematic review and meta-analysis. However,  
24 once our findings are disseminated, it will be shared through social networks.  
25  
26

### 27 28 **Ethics and dissemination**

29  
30 There are no ethical considerations associated with this study as we will use publicly available  
31 data from previously published studies. We plan to publish results in open-access peer-reviewed  
32 journals and present at international and national conferences.  
33  
34  
35

### 36 37 **Amendments**

38  
39 The protocol for this study will be amended as necessary.  
40  
41

### 42 43 **Abbreviations**

44  
45 2019-nCoV = 2019 novel Coronavirus, COVID-19 = Coronavirus Disease-2019, SARS = Severe  
46 Acute Respiratory Syndrome, RCTs = Randomized Controlled Trials, SARS-CoV-2 = Severe  
47 Acute Respiratory Syndrome Coronavirus-2, MERS = Middle East Respiratory Syndrome  
48  
49  
50  
51  
52  
53  
54  
55  
56  
57

## Declarations

### Competing interests

All review authors declare that they have no competing interests. The funder has not any role in the design, syntheses, and report of the study.

### Funding

This study is supported by Center for Innovative Drug Development and Therapeutic Trials for Africa (CDT-Africa), College of Health Sciences, Addis Ababa University.

### Authors' contributions

DG (first author) conceived the study, developed the study criteria, searched the literature, wrote the protocol and drafting the manuscript. DG (second author) conducted the preliminary search and TM revised the manuscript. All authors have read and approved the manuscript.

### Acknowledgment

The authors would like to acknowledge the Center for Innovative Drug Development and Therapeutic Trials for Africa (CDT-Africa), College of Health Sciences, Addis Ababa University which funds this study.

## References

1. Wu F, Zhao S, Yu B et al. Complete genome characterization of a novel coronavirus associated with severe human respiratory disease in Wuhan, China. bioRxiv 2020; [Epub ahead of print].
2. Zhou P, Yang XL, Wang XG et al. Discovery of a novel coronavirus associated with the recent pneumonia outbreak in humans and its potential bat origin. bioRxiv 2020; [Epub ahead of print].
3. Lu R, Zhao X, Li J et al. Genomic characterisation and epidemiology of 2019 novel coronavirus: implications for virus origins and receptor binding. Lancet 2020; [Epub ahead of print].
4. Sohrabi C, Alsafi Z, O'Neill N et al. World health organization declares global emergency: A review of the 2019 novel coronavirus (COVID-19). Int J Surg. 2020; 76:71-76.

- 1
  - 2
  - 3
  - 4
  - 5
  - 6
  - 7
  - 8
  - 9
  - 10
  - 11
  - 12
  - 13
  - 14
  - 15
  - 16
  - 17
  - 18
  - 19
  - 20
  - 21
  - 22
  - 23
  - 24
  - 25
  - 26
  - 27
  - 28
  - 29
  - 30
  - 31
  - 32
  - 33
  - 34
  - 35
  - 36
  - 37
  - 38
  - 39
  - 40
  - 41
  - 42
  - 43
  - 44
  - 45
  - 46
  - 47
  - 48
  - 49
  - 50
  - 51
  - 52
  - 53
  - 54
  - 55
  - 56
  - 57
  - 58
  - 59
  - 60
5. Worldometer. Coronavirus update (Live). <https://www.worldometers.info/coronavirus/>
6. Zhang C, Huang S, Zheng F et al. Controversial treatments: An update understanding of the coronavirus Diseases 2019. *J Med Virol.* 2020; DOI:10.1002/jmv.25788
7. Hongzhou Lu. Drug treatment options for the 2019-new coronavirus (2019-nCoV). *BioScience Trends.* 2020; 14:69-71.
8. Li G & De Clercq E. Therapeutic options for the 2019 novel coronavirus (2019-nCoV). [www.nature.com](http://www.nature.com). 2020; 19:149-150
9. US National Library of Medicine. Clinical Trials Registry 2020 [updated 29 March 2020; Available from: <https://clinicaltrials.gov/ct2/results?term=covid+19+&Search=Search>.
10. Center for disease control and prevention. Information for Clinicians on Therapeutic Options for COVID-19 Patients 2020 [updated 21 March 2020; cited 2020. Available from: <https://www.cdc.gov/coronavirus/2019-ncov/hcp/therapeutic-options.html>.
11. The First Affiliated Hospital Zhejiang University School of Medicine. Handbook of COVID-19 Prevention and Treatment. [Hand Book]. In press 2020.
12. Li H, Wang Y, Xu J, Cao B. Potential antiviral therapeutics for 2019 Novel Coronavirus. *Chinese journal of tuberculosis and respiratory diseases.* 2020; 43:E002-E.
13. Paules CI, Marston HD, Fauci AS. Coronavirus Infections-More Than Just the Common Cold. *JAMA.* 2020.
14. Devlin H and Sample I. Hopes rise over experimental drug's effectiveness against coronavirus. *The Guardian.* 2020; 10 March 2020.
15. Dong L, Hu S, Gao J. Discovering drugs to treat coronavirus disease 2019 (COVID-19). *Drug Discoveries & Therapeutics.* 2020; 14:58-60.
16. Chan KW, Wong VT, Tang SC. COVID-19: An update on the Epidemiological, Clinical, Preventive and Therapeutic Evidence and Guidelines of Integrative Chinese-Western Medicine for the Management of 2019 Novel Coronavirus Disease. *Am J Chin Med.* 2020; 1-26.
17. U.S. National Institutes of Health (NIH). Antiviral remdesivir prevents disease progression in monkeys with COVID-19: Study supports clinical testing under way across U.S. News Release, 17 April, 2020. Available at <https://www.nih.gov/news-events/news-releases/antiviral-remdesivir-prevents-disease-progression-monkeys-covid-19>

18. U.S Centers for Disease Control and Prevention (CDC). Information for Clinicians on Investigational Therapeutics for Patients with COVID-19. CDC, 13 April 2020. Available at <https://www.cdc.gov/coronavirus/2019-ncov/hcp/therapeutic-options.html>.
19. Agostini ML, Andres EL, Sims AC et al. Coronavirus susceptibility to the antiviral remdesivir (gs-5734) is mediated by the viral polymerase and the proofreading exoribonuclease. *mBio*. 2018; 9: e00221–18. <https://doi.org/10.1128/mBio.00221-18>
20. Guo YR, Cao QD, Hong ZS et al. The origin, transmission and clinical therapies on coronavirus disease 2019 (COVID-19) outbreak – an update on the status. *Military Medical Research*. 2020; 7:11. <https://doi.org/10.1186/s40779-020-00240-0>
21. Holshue ML, DeBolt C, Lindquist S, et al. First case of 2019 novel coronavirus in the United States. *N Engl J Med*. 2020; <https://doi.org/10.1056/NEJMoa2001191> [Epub ahead of print].
22. Shamseer L, Moher D, Clarke M, et al. Preferred reporting items for systematic review and meta-analysis protocols (PRISMA-P) 2015: elaboration and explanation. *BMJ* 2015;350:g7647.
23. Gebrie D, Getnet D, Manyazewal T. Efficacy of remdesivir versus placebo for the treatment of coronavirus diseases 2019 (COVID-19): A protocol for systematic review and meta-analysis of randomized controlled trials. PROSPERO 2020 CRD42020177953 Available from: [https://www.crd.york.ac.uk/prospERO/display\\_record.php?ID=CRD42020177953](https://www.crd.york.ac.uk/prospERO/display_record.php?ID=CRD42020177953)
24. Guyatt GH, Oxman AD, Kunz R, et al. GRADE guidelines: 2. Framing the questions and deciding on important outcomes. *J Clin Epidemiol*. 2011; 64:395-400.
25. Higgins JPT. *Cochrane handbook for systematic reviews of interventions*, 2nd ed. John Wiley & Sons; 2019.
26. Review Manager (RevMan) [Computer program]. Version 5.3. Copenhagen: The Nordic Cochrane Centre, The Cochrane Collaboration, 2014.
27. Suesse T, Liu I. Mantel–Haenszel estimators of a common odds ratio for multiple response data. *Statistical Methods & Applications*. 2019; 28:57-76.
28. Higgins JP, Thompson SG, Deeks JJ et al. Measuring inconsistency in meta-analyses. *BMJ*. 2003; 327:557-60.
29. Higgins JP, Thompson SG. Quantifying heterogeneity in a meta-analysis. *Stat Med*. 2002; 21:1539-58.

- 1  
2  
3 30. Bell A, Fairbrother M, Jones K. Fixed and random effects models: making an informed  
4 choice. *Quality & Quantity*. 2019; 53:1051-74.  
5  
6  
7 31. Sterne JAC, Egger M, Moher D. Chapter 10: Addressing reporting biases. 2011. In:  
8 *Cochrane Handbook for Systematic Reviews of Interventions Version 510 (updated March*  
9 *2011)* [Internet]. The Cochrane Collaboration, 2011. Available from [www.cochrane-](http://www.cochrane-handbook.org)  
10 [handbook.org](http://www.cochrane-handbook.org).  
11  
12  
13  
14  
15  
16  
17  
18  
19  
20  
21  
22  
23  
24  
25  
26  
27  
28  
29  
30  
31  
32  
33  
34  
35  
36  
37  
38  
39  
40  
41  
42  
43  
44  
45  
46  
47  
48  
49  
50  
51  
52  
53  
54  
55  
56  
57  
58  
59  
60

For peer review only

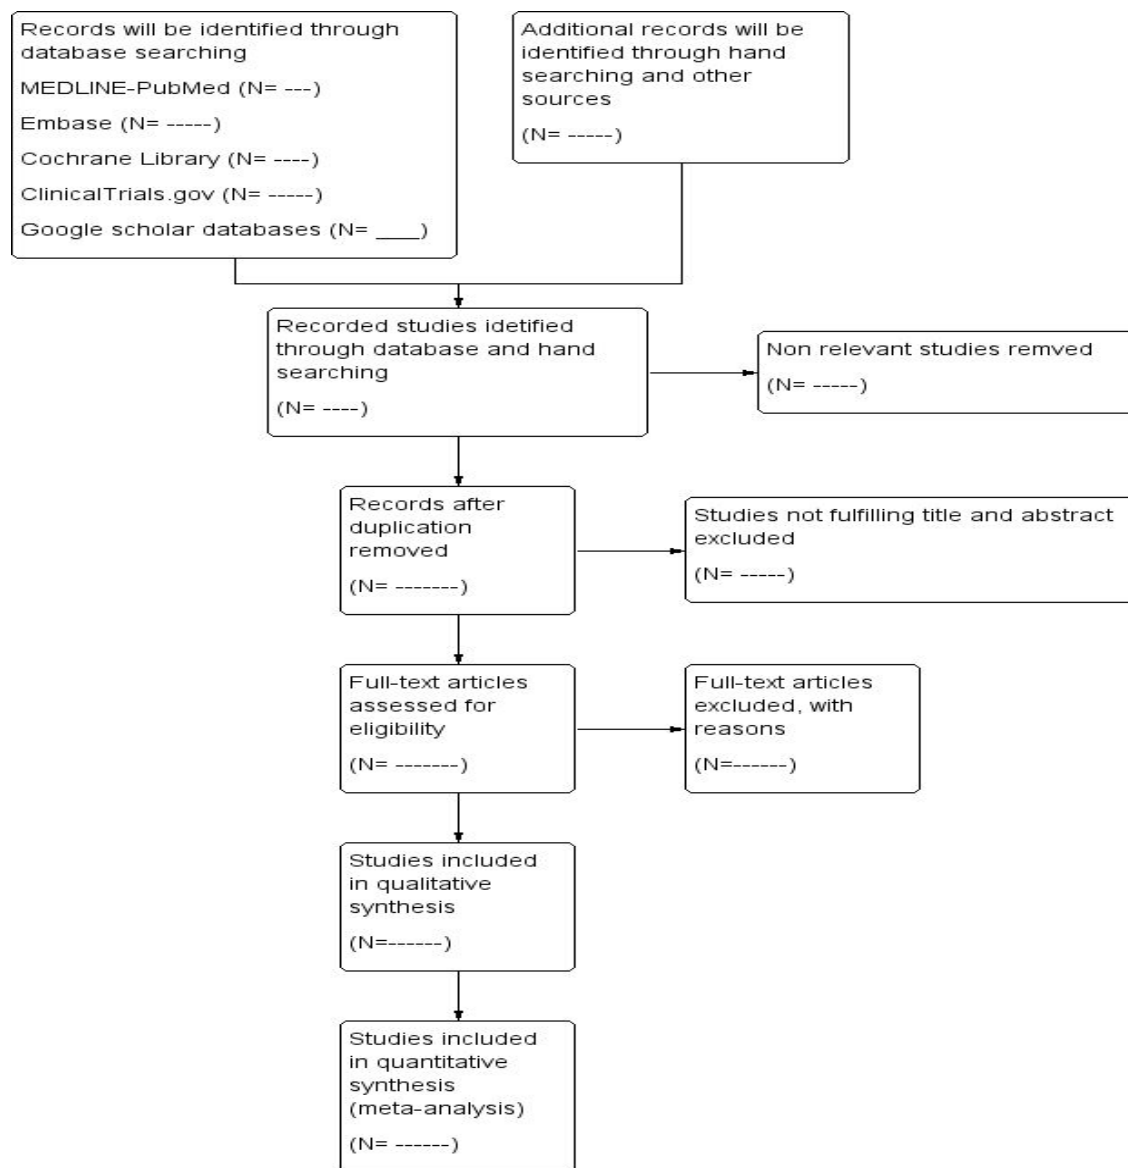

**PRISMA-P (Preferred Reporting Items for Systematic review and Meta-Analysis Protocols) 2015 checklist: recommended items to address in a systematic review protocol\***

| Section and topic                 | Item No | Checklist item                                                                                                                                                                                                                | Page |
|-----------------------------------|---------|-------------------------------------------------------------------------------------------------------------------------------------------------------------------------------------------------------------------------------|------|
| <b>ADMINISTRATIVE INFORMATION</b> |         |                                                                                                                                                                                                                               |      |
| Title:                            |         |                                                                                                                                                                                                                               |      |
| Identification                    | 1a      | Identify the report as a protocol of a systematic review                                                                                                                                                                      |      |
| Update                            | 1b      | If the protocol is for an update of a previous systematic review, identify as such                                                                                                                                            | 1    |
| Registration                      | 2       | If registered, provide the name of the registry (such as PROSPERO) and registration number                                                                                                                                    | 2    |
| Authors:                          |         |                                                                                                                                                                                                                               |      |
| Contact                           | 3a      | Provide name, institutional affiliation, e-mail address of all protocol authors; provide physical mailing address of corresponding author                                                                                     | 1    |
| Contributions                     | 3b      | Describe contributions of protocol authors and identify the guarantor of the review                                                                                                                                           | 9    |
| Amendments                        | 4       | If the protocol represents an amendment of a previously completed or published protocol, identify as such and list changes; otherwise, state plan for documenting important protocol amendments                               | 8    |
| Support:                          |         |                                                                                                                                                                                                                               |      |
| Sources                           | 5a      | Indicate sources of financial or other support for the review                                                                                                                                                                 |      |
| Sponsor                           | 5b      | Provide name for the review funder and/or sponsor                                                                                                                                                                             |      |
| Role of sponsor or funder         | 5c      | Describe roles of funder(s), sponsor(s), and/or institution(s), if any, in developing the protocol                                                                                                                            | 9    |
| <b>INTRODUCTION</b>               |         |                                                                                                                                                                                                                               |      |
| Rationale                         | 6       | Describe the rationale for the review in the context of what is already known                                                                                                                                                 | 4    |
| Objectives                        | 7       | Provide an explicit statement of the question(s) the review will address with reference to participants, interventions, comparators, and outcomes (PICO)                                                                      | 4    |
| <b>METHODS</b>                    |         |                                                                                                                                                                                                                               |      |
| Eligibility criteria              | 8       | Specify the study characteristics (such as PICO, study design, setting, time frame) and report characteristics (such as years considered, language, publication status) to be used as criteria for eligibility for the review | 6    |
| Information sources               | 9       | Describe all intended information sources (such as electronic databases, contact with study authors, trial registers or other grey literature sources) with planned dates of coverage                                         | 5    |
| Search strategy                   | 10      | Present draft of search strategy to be used for at least one electronic database, including planned limits, such that it could be repeated                                                                                    | 5    |



|                                    |     |                                                                                                                                                                                                                                                     |     |
|------------------------------------|-----|-----------------------------------------------------------------------------------------------------------------------------------------------------------------------------------------------------------------------------------------------------|-----|
| Study records:                     |     |                                                                                                                                                                                                                                                     |     |
| Data management                    | 11a | Describe the mechanism(s) that will be used to manage records and data throughout the review                                                                                                                                                        | 6   |
| Selection process                  | 11b | State the process that will be used for selecting studies (such as two independent reviewers) through each phase of the review (that is, screening, eligibility and inclusion in meta-analysis)                                                     | 6   |
| Data collection process            | 11c | Describe planned method of extracting data from reports (such as piloting forms, done independently, in duplicate), any processes for obtaining and confirming data from investigators                                                              | 6   |
| Data items                         | 12  | List and define all variables for which data will be sought (such as PICO items, funding sources), any pre-planned data assumptions and simplifications                                                                                             | 6,7 |
| Outcomes and prioritization        | 13  | List and define all outcomes for which data will be sought, including prioritization of main and additional outcomes, with rationale                                                                                                                | 6   |
| Risk of bias in individual studies | 14  | Describe anticipated methods for assessing risk of bias of individual studies, including whether this will be done at the outcome or study level, or both; state how this information will be used in data synthesis                                | 7   |
| Data synthesis                     | 15a | Describe criteria under which study data will be quantitatively synthesised                                                                                                                                                                         | 7   |
|                                    | 15b | If data are appropriate for quantitative synthesis, describe planned summary measures, methods of handling data and methods of combining data from studies, including any planned exploration of consistency (such as I <sup>2</sup> , Kendall's τ) | 7   |
|                                    | 15c | Describe any proposed additional analyses (such as sensitivity or subgroup analyses, meta-regression)                                                                                                                                               | 7   |
|                                    | 15d | If quantitative synthesis is not appropriate, describe the type of summary planned                                                                                                                                                                  | 7   |
| Meta-bias(es)                      | 16  | Specify any planned assessment of meta-bias(es) (such as publication bias across studies, selective reporting within studies)                                                                                                                       | 8   |
| Confidence in cumulative evidence  | 17  | Describe how the strength of the body of evidence will be assessed (such as GRADE)                                                                                                                                                                  | 8   |

**\* It is strongly recommended that this checklist be read in conjunction with the PRISMA-P Explanation and Elaboration (cite when available) for important clarification on the items. Amendments to a review protocol should be tracked and dated. The copyright for PRISMA-P (including checklist) is held by the PRISMA-P Group and is distributed under a Creative Commons Attribution Licence 4.0.**

*From: Shamseer L, Moher D, Clarke M, Ghersi D, Liberati A, Petticrew M, Shekelle P, Stewart L, PRISMA-P Group. Preferred reporting items for systematic review and meta-analysis protocols (PRISMA-P) 2015: elaboration and explanation. BMJ. 2015 Jan 2;349(jan02 1):g7647.*

### PubMed search strategy

This search strategy does not include any limit and this will be updated because there are ongoing trials which should be included in this study.

| #  | Searches                                                                                                                                                                                                                                                                                                                                                                                                                                                                       | Results |
|----|--------------------------------------------------------------------------------------------------------------------------------------------------------------------------------------------------------------------------------------------------------------------------------------------------------------------------------------------------------------------------------------------------------------------------------------------------------------------------------|---------|
| 1  | "remdesivir"[Supplementary Concept] OR "remdesivir"[All Fields]                                                                                                                                                                                                                                                                                                                                                                                                                | 81      |
| 2  | "viruses/drug effects"[MeSH Terms]                                                                                                                                                                                                                                                                                                                                                                                                                                             | 59,974  |
| 3  | ((("antiviral agents"[Pharmacological Action] OR "antiviral agents"[MeSH Terms]) OR ("antiviral"[All Fields] AND "agents"[All Fields])) OR "antiviral agents"[All Fields]                                                                                                                                                                                                                                                                                                      | 383,998 |
| 4  | "Nucleotide-analogue"[All Fields]                                                                                                                                                                                                                                                                                                                                                                                                                                              | 797     |
| 5  | (((((("antiviral agents"[Pharmacological Action] OR "antiviral agents"[MeSH Terms]) OR ("antiviral"[All Fields] AND "agents"[All Fields])) OR "antiviral agents"[All Fields]) OR ("antiviral"[All Fields] AND "drug"[All Fields])) OR "antiviral drug"[All Fields]                                                                                                                                                                                                             | 392,120 |
| 6  | (((((("antiviral agents"[Pharmacological Action] OR "antiviral agents"[MeSH Terms]) OR ("antiviral"[All Fields] AND "agents"[All Fields])) OR "antiviral agents"[All Fields]) OR ("antiviral"[All Fields] AND "drug"[All Fields])) OR "antiviral drug"[All Fields]) AND "antiviral agents/therapeutic use"[MeSH Terms]                                                                                                                                                         | 98,451  |
| 7  | 1 OR 2 OR 3 OR 4 OR 5 OR 6                                                                                                                                                                                                                                                                                                                                                                                                                                                     | 407,526 |
| 8  | "coronavirus"[MeSH Terms] OR "coronavirus"[All Fields] OR "coronaviruses"[All Fields]                                                                                                                                                                                                                                                                                                                                                                                          | 18,508  |
| 9  | ((("coronavirus"[MeSH Terms] OR "coronavirus"[All Fields]) OR "coronaviruses"[All Fields]) AND "coronavirus infections/virology"[MeSH Major Topic]                                                                                                                                                                                                                                                                                                                             | 1,050   |
| 10 | "covid 19"[Supplementary Concept] OR "covid 19"[All Fields] OR "coronavirus disease 2019"[All Fields]                                                                                                                                                                                                                                                                                                                                                                          | 4,227   |
| 11 | (((((("covid 19"[All Fields] OR "covid 2019"[All Fields]) OR "severe acute respiratory syndrome coronavirus 2"[Supplementary Concept]) OR "severe acute respiratory syndrome coronavirus 2"[All Fields]) OR "2019 ncov"[All Fields]) OR "sars cov 2"[All Fields]) OR "2019ncov"[All Fields]) OR (("wuhan"[All Fields] AND ("coronavirus"[MeSH Terms] OR "coronavirus"[All Fields])) AND (2019/12/1:2019/12/31[Date - Publication] OR 2020/1/1:2020/12/31[Date - Publication])) | 4,656   |
| 12 | "severe acute respiratory syndrome coronavirus 2"[Supplementary Concept] OR "severe acute respiratory syndrome coronavirus 2"[All Fields] OR "2019 novel coronavirus"[All Fields]                                                                                                                                                                                                                                                                                              | 1,429   |

|    |                                                                                                                                                                                                                                                                                                                                                                                                                                                                                                                                                                                                                                                                                                                                                   |         |
|----|---------------------------------------------------------------------------------------------------------------------------------------------------------------------------------------------------------------------------------------------------------------------------------------------------------------------------------------------------------------------------------------------------------------------------------------------------------------------------------------------------------------------------------------------------------------------------------------------------------------------------------------------------------------------------------------------------------------------------------------------------|---------|
| 13 | "severe acute respiratory syndrome coronavirus 2"[Supplementary Concept] OR "severe acute respiratory syndrome coronavirus 2"[All Fields] OR "2019 ncov"[All Fields]                                                                                                                                                                                                                                                                                                                                                                                                                                                                                                                                                                              | 1,465   |
| 14 | "severe acute respiratory syndrome coronavirus 2"[Supplementary Concept] OR "severe acute respiratory syndrome coronavirus 2"[All Fields] OR "sars cov 2"[All Fields]                                                                                                                                                                                                                                                                                                                                                                                                                                                                                                                                                                             | 1,931   |
| 15 | "spike glycoprotein sars cov"[Supplementary Concept]                                                                                                                                                                                                                                                                                                                                                                                                                                                                                                                                                                                                                                                                                              | 452     |
| 16 | (((((("sever"[All Fields] OR "severe"[All Fields]) OR "severed"[All Fields]) OR "severely"[All Fields]) OR "severer"[All Fields]) OR "severes"[All Fields]) OR "severing"[All Fields]) OR "severities"[All Fields]) OR "severity"[All Fields]) OR "severs"[All Fields]) AND (("acute"[All Fields] OR "acutely"[All Fields]) OR "acutes"[All Fields]) AND "respiratory"[All Fields] AND ((((((("syndrom"[All Fields] OR "syndromal"[All Fields]) OR "syndromally"[All Fields]) OR "syndrome"[MeSH Terms]) OR "syndrome"[All Fields]) OR "syndromes"[All Fields]) OR "syndrome s"[All Fields]) OR "syndromic"[All Fields]) OR "syndroms"[All Fields]) AND (("coronavirus"[MeSH Terms] OR "coronavirus"[All Fields]) OR "coronaviruses"[All Fields]) | 4,936   |
| 17 | 8 OR 9 OR 10 OR 11 OR 12 OR 13 OR 14 OR 15 OR 16                                                                                                                                                                                                                                                                                                                                                                                                                                                                                                                                                                                                                                                                                                  | 20,471  |
| 18 | "randomized controlled trial"[Publication Type] OR "randomized controlled trials as topic"[MeSH Terms] OR "randomized controlled trials"[All Fields] OR "randomised controlled trials"[All Fields]                                                                                                                                                                                                                                                                                                                                                                                                                                                                                                                                                | 676,631 |
| 19 | "randomized controlled trials as topic/methods"[MeSH Terms]                                                                                                                                                                                                                                                                                                                                                                                                                                                                                                                                                                                                                                                                                       | 9,652   |
| 20 | "RCTs"[All Fields]                                                                                                                                                                                                                                                                                                                                                                                                                                                                                                                                                                                                                                                                                                                                | 32,846  |
| 21 | 18 OR 19 OR 20                                                                                                                                                                                                                                                                                                                                                                                                                                                                                                                                                                                                                                                                                                                                    | 681,739 |
| 22 | 7 AND 17 AND 21                                                                                                                                                                                                                                                                                                                                                                                                                                                                                                                                                                                                                                                                                                                                   | 18      |

# BMJ Open

## Efficacy of remdesivir in patients with COVID-19: A protocol for systematic review and meta-analysis of randomized controlled trials

|                                 |                                                                                                                                                                                                                                                                                                                                                                                                                                                                                                                                                                        |
|---------------------------------|------------------------------------------------------------------------------------------------------------------------------------------------------------------------------------------------------------------------------------------------------------------------------------------------------------------------------------------------------------------------------------------------------------------------------------------------------------------------------------------------------------------------------------------------------------------------|
| Journal:                        | <i>BMJ Open</i>                                                                                                                                                                                                                                                                                                                                                                                                                                                                                                                                                        |
| Manuscript ID                   | bmjopen-2020-039159.R2                                                                                                                                                                                                                                                                                                                                                                                                                                                                                                                                                 |
| Article Type:                   | Protocol                                                                                                                                                                                                                                                                                                                                                                                                                                                                                                                                                               |
| Date Submitted by the Author:   | 13-May-2020                                                                                                                                                                                                                                                                                                                                                                                                                                                                                                                                                            |
| Complete List of Authors:       | Gebrie, Desye; Center for Innovative Drug Development and Therapeutic Trials for Africa, College of Health Sciences, Addis Ababa University, Addis Ababa, Ethiopia, ; School of Pharmacy, College of Health Sciences, Mekelle University, Mekelle, Ethiopia, Getnet, Desalegn; Pharmacology and Toxicology Course and Research Team, Department of Pharmacy, College of Health Sciences, Adigrat University, Adigrat, Ethiopia Manyazewal, Tsegahun; Center for Innovative Drug Development and Therapeutic Trials for Africa , ; Ethiopian Public Health Association, |
| <b>Primary Subject Heading</b>: | Respiratory medicine                                                                                                                                                                                                                                                                                                                                                                                                                                                                                                                                                   |
| Secondary Subject Heading:      | Respiratory medicine, Infectious diseases                                                                                                                                                                                                                                                                                                                                                                                                                                                                                                                              |
| Keywords:                       | Clinical trials < THERAPEUTICS, VIROLOGY, Respiratory infections < THORACIC MEDICINE, Infection control < INFECTIOUS DISEASES                                                                                                                                                                                                                                                                                                                                                                                                                                          |
|                                 |                                                                                                                                                                                                                                                                                                                                                                                                                                                                                                                                                                        |

SCHOLARONE™  
Manuscripts



I, the Submitting Author has the right to grant and does grant on behalf of all authors of the Work (as defined in the below author licence), an exclusive licence and/or a non-exclusive licence for contributions from authors who are: i) UK Crown employees; ii) where BMJ has agreed a CC-BY licence shall apply, and/or iii) in accordance with the terms applicable for US Federal Government officers or employees acting as part of their official duties; on a worldwide, perpetual, irrevocable, royalty-free basis to BMJ Publishing Group Ltd ("BMJ") its licensees and where the relevant Journal is co-owned by BMJ to the co-owners of the Journal, to publish the Work in this journal and any other BMJ products and to exploit all rights, as set out in our [licence](#).

The Submitting Author accepts and understands that any supply made under these terms is made by BMJ to the Submitting Author unless you are acting as an employee on behalf of your employer or a postgraduate student of an affiliated institution which is paying any applicable article publishing charge ("APC") for Open Access articles. Where the Submitting Author wishes to make the Work available on an Open Access basis (and intends to pay the relevant APC), the terms of reuse of such Open Access shall be governed by a Creative Commons licence – details of these licences and which [Creative Commons](#) licence will apply to this Work are set out in our licence referred to above.

Other than as permitted in any relevant BMJ Author's Self Archiving Policies, I confirm this Work has not been accepted for publication elsewhere, is not being considered for publication elsewhere and does not duplicate material already published. I confirm all authors consent to publication of this Work and authorise the granting of this licence.

1  
2  
3 **Efficacy of remdesivir in patients with COVID-19: A protocol for systematic review and**  
4 **meta-analysis of randomized controlled trials**  
5

6  
7 Desye Gebrie<sup>1,2</sup>, Desalegn Getnet<sup>3</sup>, Tsegahun Manyazewal<sup>1</sup>  
8  
9

10  
11  
12 <sup>1</sup>Addis Ababa University, College of Health Sciences, Center for Innovative Drug Development  
13 and Therapeutic Trials for Africa, Addis Ababa, Ethiopia  
14

15  
16 <sup>2</sup>School of Pharmacy, College of Health Sciences, Mekelle University, Mekelle, Ethiopia  
17

18  
19 <sup>3</sup>Pharmacology and Toxicology Course and Research Team, Department of Pharmacy, College of  
20 Health Sciences, Adigrat University, Adigrat, Ethiopia  
21

22  
23  
24  
25 Correspondence: Desye Gebrie: [desye.gebrie@mu.edu.et](mailto:desye.gebrie@mu.edu.et). <sup>1</sup>[Addis Ababa University, College of](#)  
26 [Health Sciences, Center for Innovative Drug Development and Therapeutic Trials for Africa,](#)  
27 [Addis Ababa, Ethiopia;](#) <sup>2</sup>[School of Pharmacy, College of Health Sciences, Mekelle University,](#)  
28 [Mekelle, Ethiopia.](#) B Tel: (+251)1118787311, Fax: (+251) 115511079, P.O. Box 9086, Addis  
29  
30  
31  
32 Ababa, Ethiopia  
33  
34  
35  
36

37 Co-authors' Email Address

38  
39 Desalegn Getnet: [desget361@gmail.com](mailto:desget361@gmail.com)  
40

41  
42 Tsegahun Manyazewal: [tsegahunm@gmail.com](mailto:tsegahunm@gmail.com)  
43  
44  
45  
46  
47  
48  
49  
50  
51  
52  
53  
54  
55  
56  
57  
58  
59  
60

## Abstract

**Background:** Despite global containment measures to fight the coronavirus disease 2019 (COVID-19), the pandemic continued to rise, rapidly spread across the world, and resulting in 2.6 million confirmed cases and 185,061 deaths worldwide as of 23 April 2020. Yet, there are no approved vaccines or drugs to make the disease less deadly, while efforts are underway. Remdesivir, a nucleotide-analogue antiviral drug developed for Ebola, is determined to prevent and stop infections with COVID-19, while results are yet controversial. Here, we aim to conduct a systematic review and meta-analysis of randomized controlled trials to evaluate the efficacy of remdesivir in patients with COVID-19.

**Method and analysis:** We will search MEDLINE-PubMed, Embase, Cochrane Library, ClinicalTrials.gov, and Google scholar databases for articles published as of 30 June 2020 and we will complete the study on 30 August 2020. We will follow the Preferred Reporting Items for Systematic Review and Meta-Analysis (PRISMA-P) 2015 guidelines for the design and reporting of the results. We will include randomized controlled trials that assessed the efficacy of remdesivir versus placebo or standard of care. The primary endpoint will be time to clinical recovery (TTCR). The secondary endpoints will be proportion of participants relieved from clinical symptoms defined at the time (in hours) from initiation of the study treatment, all-cause mortality, discharged date, frequency of respiratory progression, and treatment-emergent adverse events. RevMan 5.3 software will be used for statistical analysis. Random effect model will be carried out to calculate mean differences for continuous outcome data and risk ratio for dichotomous outcome data between remdesivir and placebo or standard of care.

**Ethics and dissemination:** There are no ethical considerations associated with this study as we will use publicly available data from previously published studies. We plan to publish results in open-access peer-reviewed journals and present at international and national conferences.

**PROSPERO registration number:** CRD42020177953.

**Keywords:** coronavirus disease 2019; COVID-19; 2019 novel coronavirus; 2019-nCoV; remdesivir; treatment; randomized controlled trials; systematic review; meta-analysis; protocol.

## Strengths and limitations of this study

- This will be the first systematic review and meta-analysis to evaluate the efficacy of remdesivir for COVID-19, which is a newly originated deadly disease.
- Its compliance with the Preferred Reporting Items for Systematic reviews and Meta-Analyses for Protocols 2015 (PRISMA-P 2015) will ensure the quality of reporting.
- The use of a combination of multiple electronic databases will include all eligible articles and provide accurate conclusions.
- The use of rigorous subgroup and sensitivity analysis will identify possible reasons that may cause significant heterogeneity between studies.
- Its singular focus on one antiviral treatment may preclude decision making and calls for network meta-analyses once trial results are made available.



## Introduction

Coronavirus diseases 2019 (COVID-19) is caused by a novel  $\beta$ -coronavirus which is named as SARS-CoV-2. SARS-CoV-2 shares 79% RNA sequence identity with Severe Acute Respiratory Syndrome Coronavirus (SARS-CoV) and 50% genomic sequence identity with Middle East Respiratory Syndrome Coronavirus (MERS-CoV) which caused a major outbreak since 2002 and 2012 in China and Saud Arabia respectively [1-4]. Despite global containment measures to fight the disease, the pandemic continued to rise, rapidly spread across the world, and resulting in 2.6 million confirmed cases and 185,061 deaths worldwide as of 23 April 2020 [5,6]. The outbreak of COVID-19 infection has a significant threat to international health, the economy, psychological stress and mental health worldwide, [7-10]. Yet, there are no approved vaccines or drugs to make the disease less deadly; implying that searching therapeutic options are critical issues to overcome the outbreak [11-12].

Studies are strongly underway to discover rapidly drug candidates for COVID-19, and studies are looking into repurposing drugs that have been used for the treatment of other diseases. As of 29 March 2020, there were 209 clinical trials registered in ClinicalTrials.gov for COVID-19 therapeutic studies and this number is estimated to go over 500 [13]. Currently, several drugs including remdesivir, hydroxychloroquine, chloroquine, Ritonavir+Lopinavir, Arbidol, and interferon are under randomized controlled trials (RCTs) for efficacy and/or safety evaluations in patients with COVID-19 in different countries [14-19]. Remdesivir (GS-5734) is among these investigational drugs and some studies reported promising results [19-20]. Remdesivir is a nucleotide analogue intravenous prodrug developed by Gilead Sciences, Inc., an American biopharmaceutical company, for treatment of Ebola virus during the 2014 Ebola outbreak in Western Africa. Remdesivir shows broad-spectrum antiviral activity against many RNA viruses including SARS-CoV-2 through blocking RNA polymerase thereby terminating RNA transcription. A recent study led by the US National Institutes of Health (NIH) that involved two groups of six rhesus macaque experiment monkeys, with one group treated with remdesivir, revealed a significantly lowered COVID-19 disease progression due to remdesivir [21]. According to a recent report of the U.S Centers for Disease Control and Prevention (CDC), in vitro and cell culture studies demonstrated broad-spectrum activity of remdesivir against coronavirus [22]. Nucleoside analogues such as remdesivir can have multiple mechanisms of action, including

1  
2  
3 lethal mutagenesis, obligate or nonobligate chain termination, and perturbation of natural  
4 nucleotide triphosphate pools via inhibition of nucleotide biosynthesis [23-24]. In vitro, remdesivir  
5 inhibits all human and animal coronaviruses including SARS-CoV-2, and has shown antiviral and  
6 clinical effects in animal models of SARS-CoV-1 and MERS-CoV infections [25-29]. Remdesivir  
7 was among the first treatments used in China as the outbreak emerges and it has been reported as  
8 potential treatment options for COVID-19 in the United States, China, and Italy [14, 16, 30].  
9 Following the topline data from the randomized, double-blinded, placebo-controlled trial  
10 conducted by National Institute of Allergy and Infectious Diseases (NIAID) [31], the US Food and  
11 Drug Administration (FDA) has issued an emergency use authorization (EUA) of the antiviral  
12 drug remdesivir for the treatment of patients with COVID-19 [32]. Though clinical trials [31,33]  
13 have showed remdesivir as a treatment option for COVID-19, while results are controversial. Thus,  
14 the proposed systematic review and meta-analysis of RCTs aims to synthesize existing evidence  
15 on the efficacy and safety of remdesivir in patients with COVID-19.  
16  
17  
18  
19  
20  
21  
22  
23  
24  
25

## 26 **Methods**

27  
28  
29 We will conduct a systematic review and meta-analysis that will comply with the Preferred  
30 Reporting Items for Systematic Review and Meta-Analysis (PRISMA-P) 2015 guidelines for the  
31 design and reporting of the results [34] (see checklist in Additional file 1). The protocol has been  
32 registered at PROSPERO database, ID: CRD42020177953 [35].  
33  
34  
35  
36

### 37 **Data sources and searches**

38  
39 We will search MEDLINE/PubMed (<http://www.ncbi.nlm.nih.gov/pubmed/>), Embase  
40 (<http://www.embase.com/>), The Cochrane Library (<http://www.cochranelibrary.com/>),  
41 ClinicaTtrials.gov (<https://www.clinicaltrials.gov/>), and google scholar  
42 (<https://scholar.google.com/>) databases for primary articles published as of 30 June 2020 and we  
43 will complete the study by 30 August 2020. We will perform hand search from the reference lists  
44 of a key articles to identify eligible RCTs and supplement the searching. We will include all  
45 potential RCTs that evaluated the efficacy of remdesivir versus placebo or standard of care in  
46 patients with COIVID-19 with no limitations on the geographical location of studies but published  
47 in English-language. We will do a rigorous search strategy using the key words including 2019  
48 novel coronavirus, 2019-nCov, coronavirus disease 2019, COVID-19, SARS-cov-2, severe acute  
49  
50  
51  
52  
53  
54  
55  
56  
57  
58  
59  
60

respiratory syndrome-coronavirus-2, remdesivir, GS-5734, nucleotide-analogue, antiviral agents, randomized controlled trials, clinical trials and RCTs. Table 1 summarizes the search strategy that we will applied in PubMed database, while details of this strategy that we will also adapt for other databases' searches is described in Additional file 2 (Table 1).

**Table 1:** Search strategy for the MEDLINE-PubMed database

|                       |     |                                                   |     |                                |
|-----------------------|-----|---------------------------------------------------|-----|--------------------------------|
| "Antiviral agents"    |     | "Coronavirus disease 2019"                        |     |                                |
| OR                    |     | OR                                                |     |                                |
| "Nucleotide-analogue" |     | "COVID-19"                                        |     | "Randomized controlled trials" |
|                       | AND | OR                                                | AND | OR                             |
| "Remdesivir"          |     | "Severe acute respiratory syndrome-coronavirus-2" |     | "RCTs"                         |
|                       |     | OR                                                |     |                                |
|                       |     | "SARS-Cov-2"                                      |     |                                |
| OR                    |     | OR                                                |     | OR                             |
|                       |     | "2019 novel coronavirus"                          |     |                                |
| "GS-5734"             |     | OR                                                |     | "Clinical trials"              |
|                       |     | "2019-nCoV"                                       |     |                                |

### Eligibility criteria

We will formulate our participant's eligibility criteria using PICOS (participants, interventions, comparison, outcomes, and study designs) description model [36].

- Participants
  - Patients with confirmed COVID-19
  - Men and/or women of any age
  - At any clinical stage of the disease, thus mild, moderate or severe/critical case
  - With or without other co-morbid conditions
- Intervention
  - Remdesivir of any dose.
- Comparator
  - Remdesivir placebo or standard of care.
- Outcomes/endpoints

- Primary endpoints
  - Time to clinical recovery (TTCR)
- Secondary endpoints
  - Proportion of participants relieved from clinical symptoms defined at the time (in hours) from initiation of the study treatment
  - All-cause mortality
  - Discharged date
  - Frequency of respiratory progression
  - Oxygen saturation
  - Treatment-emergent adverse events
- Study design
  - Only RCTs evaluating the efficacy of remdesivir versus placebo or standard of care in patients with COVID-19

### **Study selection**

All the retrieved papers will be transferred to Endnote 7 and duplicates will be removed. Two investigators will independently assess the title and abstract of all the retrieved papers based on the eligibility criteria. The two investigators will independently evaluate the full texts. Disagreements between the two investigators will settle through discussion and if persisted, the third investigator will involve as arbitrator. Figure 1 summarizes the design that we will use to report the study result in line with the PRISMA -P 2015 guidelines (Figure 1).

### **Data extraction**

Two authors will independently extract data according to the pre-designed data extraction tool. The following data will be extracted from each included RCTs

- First author
- Year of publication
- Study country
- Funding information
- Patient characteristics (mean age of the participant, sex, co-morbid conditions, number of comorbidities, symptom severity)

- Interventions (remdesivir, dose of remdesivir and route of administration)
- Comparators (remdesivir placebo, standard of care)
- Number of participants randomized in each group
- Treatment follow-up period
- Outcomes (primary, secondary and other outcomes)

### **Assessment of risk of bias**

The Cochrane risk of bias tool [37] will be used to assess the risk of bias for each included study. The risk of bias of each trial will be judged by two independent investigators as “Low”, “Some concerns”, or “High” based on the critical domains, including bias arising from the randomization process, bias due to deviations from intended interventions, bias due to missing outcome data, bias in measurement of the outcome and bias in selection of the reported result. Disagreements will be resolved by discussion among the two investigators. If the disagreements persist, the third investigator will chip in as an arbitrator.

### **Statistical analysis**

All statistical analyses will be carried out using the computer software packages RevMan 5.3 [38]. Mean differences (MDs) with 95% confidence intervals (CIs) will be used to measure the effects of treatment for continuous outcome data. We will convert other forms of data into MDs using standard conversion formula. For outcome variables reported in different scales, we will use standard mean differences (SMDs) with 95% CIs. The treatment effect of binary outcome data will be summarized using risk ratios (RRs) with 95% CIs. Other binary outcome data will be converted into RRs. Mantel-Haenszel method [39] will be used to pool effect estimates of dichotomous outcomes and inverse variance for continuous outcomes. Cochrane Q test [40] will be used to assess heterogeneity between studies, and  $I^2$  testing [41] will be done to quantify heterogeneity between studies, with values  $> 50\%$  representing moderate-to-high heterogeneity. A random-effect model will be used to pool the data [42]. Subgroup analysis will be carried out between studies with different duration of follow-up, age of participants, severity of the disease, comorbidities, settings, and quality of studies for risk of bias. Following the subgroup analysis, we will look at the data for heterogeneity, and if acceptable, we will perform a meta-analysis. If the data is heterogeneous, we will do a narrative description of findings. To see the robustness of pooled data, sensitivity analysis will be conducted between low and high risk of bias, and with or without biased

1  
2  
3 studies.. We will use the GRADEprofiler software from Cochrane Systematic Reviews to assess  
4 the quality of evidence per outcome and ultimately to create a summary of findings table and  
5 evidence profile. All statistical analysis with a p-value < 0.05 will be considered statistically  
6 significant.  
7  
8  
9

### 10 **Addressing missing data**

11  
12  
13 When individual participant's data are initially unavailable, we will review the original source,  
14 and/or published trial reports, and we will contact the authors to obtain clarification for these data.  
15  
16

### 17 **Reporting bias**

18  
19 We will conduct funnel plot and Egger test to check any possible reporting bias if a sufficient  
20 number of included studies (at least 10 trials) are available in this study [43].  
21  
22

### 23 **Patient and public involvement**

24  
25  
26 Patients and public will not be involved in this systematic review and meta-analysis. However,  
27 once our findings are disseminated, it will be shared through social networks.  
28  
29

### 30 **Ethics and dissemination**

31  
32  
33 There are no ethical considerations associated with this study as we will use publicly available  
34 data from previously published studies. We plan to publish results in open-access peer-reviewed  
35 journals and present at international and national conferences.  
36  
37  
38

### 39 **Amendments**

40  
41  
42 The protocol for this study will be amended as necessary.  
43  
44

### 45 **Abbreviations**

46  
47  
48 2019-nCoV = 2019 novel Coronavirus, COVID-19 = Coronavirus Disease-2019, SARS = Severe  
49 Acute Respiratory Syndrome, RCTs = Randomized Controlled Trials, SARS-CoV-2 = Severe  
50 Acute Respiratory Syndrome Coronavirus-2, MERS-CoV = Middle East Respiratory Syndrome  
51 Coronavirus  
52  
53  
54

## Declarations

### Competing interests

All review authors declare that they have no competing interests. The funder has not any role in the design, syntheses, and report of the study.

### Funding

This study is supported by Center for Innovative Drug Development and Therapeutic Trials for Africa (CDT-Africa), College of Health Sciences, Addis Ababa University.

### Authors' contributions

DG (first author) conceived the study, developed the study criteria, searched the literature, wrote the protocol and drafting the manuscript. DG (second author) conducted the preliminary search and TM copyediting and revised the manuscript. All authors have read and approved the manuscript.

### Acknowledgment

The authors would like to acknowledge the Center for Innovative Drug Development and Therapeutic Trials for Africa (CDT-Africa), College of Health Sciences, Addis Ababa University which funds this study.

## References

1. Wu F, Zhao S, Yu B et al. Complete genome characterization of a novel coronavirus associated with severe human respiratory disease in Wuhan, China. bioRxiv 2020; [Epub ahead of print].
2. Zhou P, Yang XL, Wang XG et al. Discovery of a novel coronavirus associated with the recent pneumonia outbreak in humans and its potential bat origin. bioRxiv 2020; [Epub ahead of print].
3. Lu R, Zhao X, Li J et al. Genomic characterisation and epidemiology of 2019 novel coronavirus: implications for virus origins and receptor binding. Lancet 2020; [Epub ahead of print].



- 1
  - 2
  - 3
  - 4
  - 5
  - 6
  - 7
  - 8
  - 9
  - 10
  - 11
  - 12
  - 13
  - 14
  - 15
  - 16
  - 17
  - 18
  - 19
  - 20
  - 21
  - 22
  - 23
  - 24
  - 25
  - 26
  - 27
  - 28
  - 29
  - 30
  - 31
  - 32
  - 33
  - 34
  - 35
  - 36
  - 37
  - 38
  - 39
  - 40
  - 41
  - 42
  - 43
  - 44
  - 45
  - 46
  - 47
  - 48
  - 49
  - 50
  - 51
  - 52
  - 53
  - 54
  - 55
  - 56
  - 57
  - 58
  - 59
  - 60
4. Morse JS, Lalonde T, Xu S, et al. Learning from the past: possible urgent prevention and treatment options for severe acute respiratory infections caused by 2019-nCoV, *Chembiochem*. 2020; 21:730–738.
5. Sohrabi C, Alsafi Z, O'Neill N et al. World health organization declares global emergency: A review of the 2019 novel coronavirus (COVID-19). *Int J Surg*. 2020; 76:71-76.
6. Worldometer. Coronavirus update (Live). <https://www.worldometers.info/coronavirus/>
7. Zhang C, Huang S, Zheng F et al. Controversial treatments: An update understanding of the coronavirus Diseases 2019. *J Med Virol*. 2020; DOI:10.1002/jmv.25788
8. Afonso P. The Impact of the COVID-19 Pandemic on Mental Health] [published online ahead of print, 2020 Apr 8]. *Acta Med Port*. 2020;10.20344/amp.13877. doi:10.20344/amp.13877.
9. Torales J, O'Higgins M, Castaldelli-Maia JM, Ventriglio A. The outbreak of COVID-19 coronavirus and its impact on global mental health [published online ahead of print, 2020 Mar 31]. *Int J Soc Psychiatry*. 2020;20764020915212. doi:10.1177/0020764020915212.
10. Hiremath P, Suhas Kowshik CS, Manjunath M, Shettar M. COVID 19: Impact of lock-down on mental health and tips to overcome [published online ahead of print, 2020 Apr 10]. *Asian J Psychiatr*. 2020; 51:102088. doi:10.1016/j.ajp.2020.102088.
11. Hongzhou Lu. Drug treatment options for the 2019-new coronavirus (2019-nCoV). *BioScience Trends*. 2020; 14:69-71.
12. Li G & De Clercq E. Therapeutic options for the 2019 novel coronavirus (2019-nCoV). [www.nature.com](http://www.nature.com). 2020; 19:149-150
13. US National Library of Medicine. Clinical Trials Registry 2020 [updated 29 March 2020; Available from: <https://clinicaltrials.gov/ct2/results?term=covid+19+&Search=Search>.
14. Center for disease control and prevention. Information for Clinicians on Therapeutic Options for COVID-19 Patients 2020 [updated 21 March 2020; cited 2020. Available from: <https://www.cdc.gov/coronavirus/2019-ncov/hcp/therapeutic-options.html>.
15. The First Affiliated Hospital Zhejiang University School of Medicine. Handbook of COVID-19 Prevention and Treatment. [Hand Book]. In press 2020.
16. Li H, Wang Y, Xu J, Cao B. Potential antiviral therapeutics for 2019 Novel Coronavirus. *Chinese journal of tuberculosis and respiratory diseases*. 2020; 43:E002-E.



17. Paules CI, Marston HD, Fauci AS. Coronavirus Infections-More Than Just the Common Cold. JAMA. 2020.
18. Devlin H and Sample I. Hopes rise over experimental drug's effectiveness against coronavirus. The Guardian. 2020; 10 March 2020.
19. Dong L, Hu S, Gao J. Discovering drugs to treat coronavirus disease 2019 (COVID-19). Drug Discoveries & Therapeutics. 2020; 14:58-60.
20. Chan KW, Wong VT, Tang SC. COIVID-19: An update on the Epidemiological, Clinical, Preventive and Therapeutic Evidence and Guidelines of Integrative Chinese-Western Medicine for the Management of 2019 Novel Coronavirus Disease. Am J Chin Med. 2020; 1-26.
21. U.S. National Institutes of Health (NIH). Antiviral remdesivir prevents disease progression in monkeys with COVID-19: Study supports clinical testing under way across U.S. News Release, 17 April, 2020. Available at <https://www.nih.gov/news-events/news-releases/antiviral-remdesivir-prevents-disease-progression-monkeys-covid-19>
22. U.S Centers for Disease Control and Prevention (CDC). Information for Clinicians on Investigational Therapeutics for Patients with COVID-19. CDC, 13 April 2020. Available at <https://www.cdc.gov/coronavirus/2019-ncov/hcp/therapeutic-options.html>.
23. Agostini ML, Andres EL, Sims AC et al. Coronavirus susceptibility to the antiviral remdesivir (gs-5734) is mediated by the viral polymerase and the proofreading exoribonuclease. mBio. 2018; 9: e00221–18. <https://doi.org/10.1128/mBio.00221-18>
24. Guo YR, Cao QD, Hong ZS et al. The origin, transmission and clinical therapies on coronavirus disease 2019 (COVID-19) outbreak – an update on the status. Military Medical Research. 2020; 7:11. <https://doi.org/10.1186/s40779-020-00240-0>
25. Sheahan TP, Sims AC, Graham RL, et al. Broad-spectrum antiviral GS-5734 inhibits both epidemic and zoonotic coronaviruses. Sci Transl Med 2017; 9: eaa13653.
26. Warren TK, Jordan R, Lo MK, et al. Therapeutic efficacy of the small molecule GS-5734 against Ebola virus in rhesus monkeys. Nature. 2016; 531: 381–85.
27. Brown AJ, Won JJ, Graham RL, et al. Broad spectrum antiviral remdesivir inhibits human endemic and zoonotic deltacoronaviruses with a highly divergent RNA dependent RNA polymerase. Antiviral Res. 2019; 169: 104541.

- 1  
2  
3 28. Sheahan TP, Sims AC, Leist SR, et al. Comparative therapeutic efficacy of remdesivir and  
4 combination lopinavir, ritonavir, and interferon beta against MERS-CoV. *Nat Commun.*  
5 2020; 11: 222.  
6  
7  
8 29. De Wit E, Feldmann F, Cronin J, et al. Prophylactic and therapeutic remdesivir (GS-5734)  
9 treatment in the rhesus macaque model of MERS-CoV infection. *Proc Natl Acad Sci USA.*  
10 2020; 117: 6771–76.  
11  
12 30. Holshue ML, DeBolt C, Lindquist S, et al. First case of 2019 novel coronavirus in the United  
13 States. *N Engl J Med.* 2020; <https://doi.org/10.1056/NEJMoa2001191> [Epub ahead of  
14 print].  
15  
16 31. National Institute of Allergy and Infectious Diseases. NIH Clinical Trial Shows Remdesivir  
17 Accelerates Recovery from Advanced COVID-19. April 29, 2020; available from:  
18 [https://www.niaid.nih.gov/news-events/nih-clinical-trial-shows-remdesivir-accelerates-](https://www.niaid.nih.gov/news-events/nih-clinical-trial-shows-remdesivir-accelerates-recovery-advanced-covid-19)  
19 [recovery-advanced-covid-19.](https://www.niaid.nih.gov/news-events/nih-clinical-trial-shows-remdesivir-accelerates-recovery-advanced-covid-19)  
20  
21  
22 32. US Food and Drug Administration. Remdesivir EUA letter of authorization. May 1, 2020;  
23 available from: <https://www.fda.gov/media/137564/download>.  
24  
25  
26 33. Wang Y, Zhang D, Du G, et al. Remdesivir in adults with severe COVID-19: a randomised,  
27 double-blind, placebo-controlled, multicentre trial. *The lancet.* 2020;  
28 [https://doi.org/10.1016/S0140-6736\(20\)31022-9](https://doi.org/10.1016/S0140-6736(20)31022-9).  
29  
30  
31 34. Shamseer L, Moher D, Clarke M, et al. Preferred reporting items for systematic review and  
32 meta-analysis protocols (PRISMA-P) 2015: elaboration and explanation. *BMJ*  
33 2015;350:g7647.  
34  
35 35. Gebrie D, Getnet D, Manyazewal T. Efficacy of remdesivir versus placebo for the treatment  
36 of coronavirus diseases 2019 (COVID-19): A protocol for systematic review and meta-  
37 analysis of randomized controlled trials. PROSPERO 2020 CRD42020177953 Available  
38 from: [https://www.crd.york.ac.uk/prospERO/display\\_record.php?ID=CRD42020177953](https://www.crd.york.ac.uk/prospERO/display_record.php?ID=CRD42020177953)  
39  
40  
41 36. Guyatt GH, Oxman AD, Kunz R, et al. GRADE guidelines: 2. Framing the questions and  
42 deciding on important outcomes. *J Clin Epidemiol.* 2011; 64:395-400.  
43  
44 37. Higgins JPT. *Cochrane handbook for systematic reviews of interventions*, 2nd ed. John  
45 Wiley & Sons; 2019.  
46  
47 38. Review Manager (RevMan) [Computer program]. Version 5.3. Copenhagen: The Nordic  
48 Cochrane Centre, The Cochrane Collaboration, 2014.  
49  
50  
51  
52  
53  
54  
55  
56  
57  
58  
59  
60

- 1
- 2
- 3 39. Suesse T, Liu I. Mantel–Haenszel estimators of a common odds ratio for multiple response
- 4 data. *Statistical Methods & Applications*. 2019; 28:57-76.
- 5
- 6 40. Higgins JP, Thompson SG, Deeks JJ et al. Measuring inconsistency in meta-analyses. *BMJ*.
- 7 2003; 327:557-60.
- 8
- 9 41. Higgins JP, Thompson SG. Quantifying heterogeneity in a meta-analysis. *Stat Med*. 2002;
- 10 21:1539-58.
- 11
- 12 42. Bell A, Fairbrother M, Jones K. Fixed and random effects models: making an informed
- 13 choice. *Quality & Quantity*. 2019; 53:1051-74.
- 14
- 15 43. Sterne JAC, Egger M, Moher D. Chapter 10: Addressing reporting biases. 2011. In:
- 16 *Cochrane Handbook for Systematic Reviews of Interventions Version 510 (updated March*
- 17 *2011) [Internet]. The Cochrane Collaboration, 2011. Available from [www.cochrane-](http://www.cochrane-handbook.org)*
- 18 *[handbook.org](http://www.cochrane-handbook.org).*
- 19
- 20
- 21
- 22
- 23
- 24
- 25
- 26
- 27
- 28
- 29
- 30
- 31
- 32
- 33
- 34
- 35
- 36
- 37
- 38
- 39
- 40
- 41
- 42
- 43
- 44
- 45
- 46
- 47
- 48
- 49
- 50
- 51
- 52
- 53
- 54
- 55
- 56
- 57
- 58
- 59
- 60

1  
2  
3 **Figure legend/caption**  
4  
5

6 **Figure 1:** PRISMA-P flow diagram of the study  
7  
8  
9  
10  
11  
12  
13  
14  
15  
16  
17  
18  
19  
20  
21  
22  
23  
24  
25  
26  
27  
28  
29  
30  
31  
32  
33  
34  
35  
36  
37  
38  
39  
40  
41  
42  
43  
44  
45  
46  
47  
48  
49  
50  
51  
52  
53  
54  
55  
56  
57

For peer review only

1  
2  
3  
4  
5  
6  
7  
8  
9  
10  
11  
12  
13  
14  
15  
16  
17  
18  
19  
20  
21  
22  
23  
24  
25  
26  
27  
28  
29  
30  
31  
32  
33  
34  
35  
36  
37  
38  
39  
40  
41  
42  
43  
44  
45  
46  
47  
48  
49  
50  
51  
52  
53  
54  
55  
56  
57  
58  
59  
60

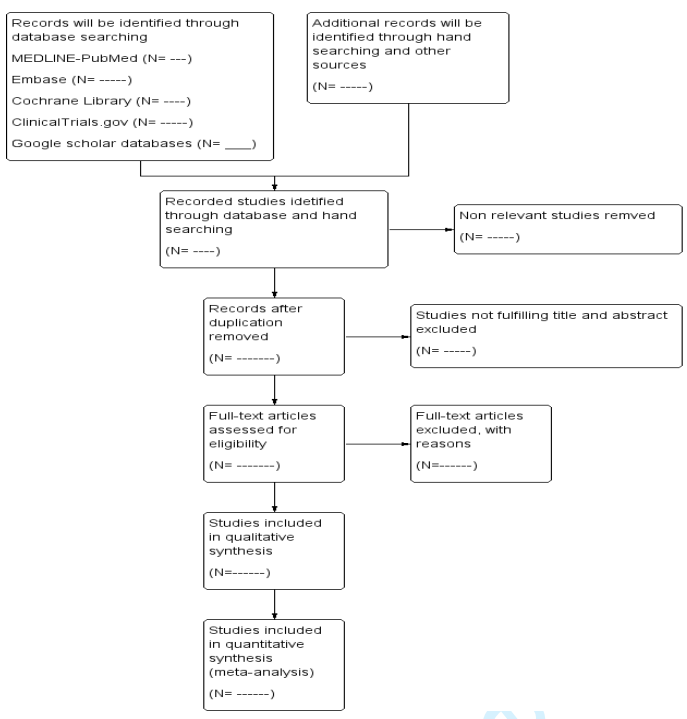

er review only

**PRISMA-P (Preferred Reporting Items for Systematic review and Meta-Analysis Protocols) 2015 checklist: recommended items to address in a systematic review protocol\***

| Section and topic                 | Item No | Checklist item                                                                                                                                                                                                                | Page    |
|-----------------------------------|---------|-------------------------------------------------------------------------------------------------------------------------------------------------------------------------------------------------------------------------------|---------|
| <b>ADMINISTRATIVE INFORMATION</b> |         |                                                                                                                                                                                                                               |         |
| Title:                            |         |                                                                                                                                                                                                                               |         |
| Identification                    | 1a      | Identify the report as a protocol of a systematic review                                                                                                                                                                      |         |
| Update                            | 1b      | If the protocol is for an update of a previous systematic review, identify as such                                                                                                                                            | 1       |
| Registration                      | 2       | If registered, provide the name of the registry (such as PROSPERO) and registration number                                                                                                                                    | 2 and 5 |
| Authors:                          |         |                                                                                                                                                                                                                               |         |
| Contact                           | 3a      | Provide name, institutional affiliation, e-mail address of all protocol authors; provide physical mailing address of corresponding author                                                                                     | 1       |
| Contributions                     | 3b      | Describe contributions of protocol authors and identify the guarantor of the review                                                                                                                                           | 10      |
| Amendments                        | 4       | If the protocol represents an amendment of a previously completed or published protocol, identify as such and list changes; otherwise, state plan for documenting important protocol amendments                               | 9       |
| Support:                          |         |                                                                                                                                                                                                                               |         |
| Sources                           | 5a      | Indicate sources of financial or other support for the review                                                                                                                                                                 |         |
| Sponsor                           | 5b      | Provide name for the review funder and/or sponsor                                                                                                                                                                             |         |
| Role of sponsor or funder         | 5c      | Describe roles of funder(s), sponsor(s), and/or institution(s), if any, in developing the protocol                                                                                                                            | 10      |
| <b>INTRODUCTION</b>               |         |                                                                                                                                                                                                                               |         |
| Rationale                         | 6       | Describe the rationale for the review in the context of what is already known                                                                                                                                                 | 4-5     |
| Objectives                        | 7       | Provide an explicit statement of the question(s) the review will address with reference to participants, interventions, comparators, and outcomes (PICO)                                                                      | 5       |
| <b>METHODS</b>                    |         |                                                                                                                                                                                                                               |         |
| Eligibility criteria              | 8       | Specify the study characteristics (such as PICO, study design, setting, time frame) and report characteristics (such as years considered, language, publication status) to be used as criteria for eligibility for the review | 6-7     |
| Information sources               | 9       | Describe all intended information sources (such as electronic databases, contact with study authors, trial registers or other grey literature sources) with planned dates of coverage                                         | 5-6     |
| Search strategy                   | 10      | Present draft of search strategy to be used for at least one electronic database, including planned limits, such that it could be repeated                                                                                    | 5-6     |

|                                    |     |                                                                                                                                                                                                                                                  |     |
|------------------------------------|-----|--------------------------------------------------------------------------------------------------------------------------------------------------------------------------------------------------------------------------------------------------|-----|
| Study records:                     |     |                                                                                                                                                                                                                                                  |     |
| Data management                    | 11a | Describe the mechanism(s) that will be used to manage records and data throughout the review                                                                                                                                                     | 7   |
| Selection process                  | 11b | State the process that will be used for selecting studies (such as two independent reviewers) through each phase of the review (that is, screening, eligibility and inclusion in meta-analysis)                                                  | 7   |
| Data collection process            | 11c | Describe planned method of extracting data from reports (such as piloting forms, done independently, in duplicate), any processes for obtaining and confirming data from investigators                                                           | 7   |
| Data items                         | 12  | List and define all variables for which data will be sought (such as PICO items, funding sources), any pre-planned data assumptions and simplifications                                                                                          | 7-8 |
| Outcomes and prioritization        | 13  | List and define all outcomes for which data will be sought, including prioritization of main and additional outcomes, with rationale                                                                                                             | 6-7 |
| Risk of bias in individual studies | 14  | Describe anticipated methods for assessing risk of bias of individual studies, including whether this will be done at the outcome or study level, or both; state how this information will be used in data synthesis                             | 8   |
| Data synthesis                     | 15a | Describe criteria under which study data will be quantitatively synthesised                                                                                                                                                                      | 8   |
|                                    | 15b | If data are appropriate for quantitative synthesis, describe planned summary measures, methods of handling data and methods of combining data from studies, including any planned exploration of consistency (such as $I^2$ , Kendall's $\tau$ ) | 8   |
|                                    | 15c | Describe any proposed additional analyses (such as sensitivity or subgroup analyses, meta-regression)                                                                                                                                            | 8   |
|                                    | 15d | If quantitative synthesis is not appropriate, describe the type of summary planned                                                                                                                                                               | 8   |
| Meta-bias(es)                      | 16  | Specify any planned assessment of meta-bias(es) (such as publication bias across studies, selective reporting within studies)                                                                                                                    | 9   |
| Confidence in cumulative evidence  | 17  | Describe how the strength of the body of evidence will be assessed (such as GRADE)                                                                                                                                                               | 9   |

**\* It is strongly recommended that this checklist be read in conjunction with the PRISMA-P Explanation and Elaboration (cite when available) for important clarification on the items. Amendments to a review protocol should be tracked and dated. The copyright for PRISMA-P (including checklist) is held by the PRISMA-P Group and is distributed under a Creative Commons Attribution Licence 4.0.**

*From: Shamseer L, Moher D, Clarke M, Ghersi D, Liberati A, Petticrew M, Shekelle P, Stewart L, PRISMA-P Group. Preferred reporting items for systematic review and meta-analysis protocols (PRISMA-P) 2015: elaboration and explanation. BMJ. 2015 Jan 2;349(jan02 1):g7647.*

### PubMed search strategy

This search strategy does not include any limit and this will be updated because there are ongoing trials which should be included in this study.

| #  | Searches                                                                                                                                                                                                                                                                                                                                                                                                                                                                       | Results |
|----|--------------------------------------------------------------------------------------------------------------------------------------------------------------------------------------------------------------------------------------------------------------------------------------------------------------------------------------------------------------------------------------------------------------------------------------------------------------------------------|---------|
| 1  | "remdesivir"[Supplementary Concept] OR "remdesivir"[All Fields]                                                                                                                                                                                                                                                                                                                                                                                                                | 81      |
| 2  | "viruses/drug effects"[MeSH Terms]                                                                                                                                                                                                                                                                                                                                                                                                                                             | 59,974  |
| 3  | ((("antiviral agents"[Pharmacological Action] OR "antiviral agents"[MeSH Terms]) OR ("antiviral"[All Fields] AND "agents"[All Fields])) OR "antiviral agents"[All Fields]                                                                                                                                                                                                                                                                                                      | 383,998 |
| 4  | "Nucleotide-analogue"[All Fields]                                                                                                                                                                                                                                                                                                                                                                                                                                              | 797     |
| 5  | (((((("antiviral agents"[Pharmacological Action] OR "antiviral agents"[MeSH Terms]) OR ("antiviral"[All Fields] AND "agents"[All Fields])) OR "antiviral agents"[All Fields]) OR ("antiviral"[All Fields] AND "drug"[All Fields])) OR "antiviral drug"[All Fields]                                                                                                                                                                                                             | 392,120 |
| 6  | (((((("antiviral agents"[Pharmacological Action] OR "antiviral agents"[MeSH Terms]) OR ("antiviral"[All Fields] AND "agents"[All Fields])) OR "antiviral agents"[All Fields]) OR ("antiviral"[All Fields] AND "drug"[All Fields])) OR "antiviral drug"[All Fields]) AND "antiviral agents/therapeutic use"[MeSH Terms]                                                                                                                                                         | 98,451  |
| 7  | 1 OR 2 OR 3 OR 4 OR 5 OR 6                                                                                                                                                                                                                                                                                                                                                                                                                                                     | 407,526 |
| 8  | "coronavirus"[MeSH Terms] OR "coronavirus"[All Fields] OR "coronaviruses"[All Fields]                                                                                                                                                                                                                                                                                                                                                                                          | 18,508  |
| 9  | ((("coronavirus"[MeSH Terms] OR "coronavirus"[All Fields]) OR "coronaviruses"[All Fields]) AND "coronavirus infections/virology"[MeSH Major Topic]                                                                                                                                                                                                                                                                                                                             | 1,050   |
| 10 | "covid 19"[Supplementary Concept] OR "covid 19"[All Fields] OR "coronavirus disease 2019"[All Fields]                                                                                                                                                                                                                                                                                                                                                                          | 4,227   |
| 11 | (((((("covid 19"[All Fields] OR "covid 2019"[All Fields]) OR "severe acute respiratory syndrome coronavirus 2"[Supplementary Concept]) OR "severe acute respiratory syndrome coronavirus 2"[All Fields]) OR "2019 ncov"[All Fields]) OR "sars cov 2"[All Fields]) OR "2019ncov"[All Fields]) OR (("wuhan"[All Fields] AND ("coronavirus"[MeSH Terms] OR "coronavirus"[All Fields])) AND (2019/12/1:2019/12/31[Date - Publication] OR 2020/1/1:2020/12/31[Date - Publication])) | 4,656   |
| 12 | "severe acute respiratory syndrome coronavirus 2"[Supplementary Concept] OR "severe acute respiratory syndrome coronavirus 2"[All Fields] OR "2019 novel coronavirus"[All Fields]                                                                                                                                                                                                                                                                                              | 1,429   |



|    |                                                                                                                                                                                                                                                                                                                                                                                                                                                                                                                                                                                                                                                                                                                                                   |         |
|----|---------------------------------------------------------------------------------------------------------------------------------------------------------------------------------------------------------------------------------------------------------------------------------------------------------------------------------------------------------------------------------------------------------------------------------------------------------------------------------------------------------------------------------------------------------------------------------------------------------------------------------------------------------------------------------------------------------------------------------------------------|---------|
| 13 | "severe acute respiratory syndrome coronavirus 2"[Supplementary Concept] OR "severe acute respiratory syndrome coronavirus 2"[All Fields] OR "2019 ncov"[All Fields]                                                                                                                                                                                                                                                                                                                                                                                                                                                                                                                                                                              | 1,465   |
| 14 | "severe acute respiratory syndrome coronavirus 2"[Supplementary Concept] OR "severe acute respiratory syndrome coronavirus 2"[All Fields] OR "sars cov 2"[All Fields]                                                                                                                                                                                                                                                                                                                                                                                                                                                                                                                                                                             | 1,931   |
| 15 | "spike glycoprotein sars cov"[Supplementary Concept]                                                                                                                                                                                                                                                                                                                                                                                                                                                                                                                                                                                                                                                                                              | 452     |
| 16 | (((((("sever"[All Fields] OR "severe"[All Fields]) OR "severed"[All Fields]) OR "severely"[All Fields]) OR "severer"[All Fields]) OR "severes"[All Fields]) OR "severing"[All Fields]) OR "severities"[All Fields]) OR "severity"[All Fields]) OR "severs"[All Fields]) AND (("acute"[All Fields] OR "acutely"[All Fields]) OR "acutes"[All Fields]) AND "respiratory"[All Fields] AND ((((((("syndrom"[All Fields] OR "syndromal"[All Fields]) OR "syndromally"[All Fields]) OR "syndrome"[MeSH Terms]) OR "syndrome"[All Fields]) OR "syndromes"[All Fields]) OR "syndrome s"[All Fields]) OR "syndromic"[All Fields]) OR "syndroms"[All Fields]) AND (("coronavirus"[MeSH Terms] OR "coronavirus"[All Fields]) OR "coronaviruses"[All Fields]) | 4,936   |
| 17 | 8 OR 9 OR 10 OR 11 OR 12 OR 13 OR 14 OR 15 OR 16                                                                                                                                                                                                                                                                                                                                                                                                                                                                                                                                                                                                                                                                                                  | 20,471  |
| 18 | "randomized controlled trial"[Publication Type] OR "randomized controlled trials as topic"[MeSH Terms] OR "randomized controlled trials"[All Fields] OR "randomised controlled trials"[All Fields]                                                                                                                                                                                                                                                                                                                                                                                                                                                                                                                                                | 676,631 |
| 19 | "randomized controlled trials as topic/methods"[MeSH Terms]                                                                                                                                                                                                                                                                                                                                                                                                                                                                                                                                                                                                                                                                                       | 9,652   |
| 20 | "RCTs"[All Fields]                                                                                                                                                                                                                                                                                                                                                                                                                                                                                                                                                                                                                                                                                                                                | 32,846  |
| 21 | 18 OR 19 OR 20                                                                                                                                                                                                                                                                                                                                                                                                                                                                                                                                                                                                                                                                                                                                    | 681,739 |
| 22 | 7 AND 17 AND 21                                                                                                                                                                                                                                                                                                                                                                                                                                                                                                                                                                                                                                                                                                                                   | 18      |
