# Supplementary material for: Efficacy of remdesivir in patients with COVID-19: a protocol for systematic review and meta-analysis of randomised controlled trials
Source: PubMed Central journal article supplement — BMJ Open. 2020 Jun 4;10(6):e039159. doi: 10.1136/bmjopen-2020-039159 (PMC7298683; doi:10.1136/bmjopen-2020-039159), 2020-06-04
Supplement: bmjopen-2020-039159supp002.pdf [file bmjopen-2020-039159supp002.pdf]

**PubMed search strategy**

This search strategy does not include any limit and this will be updated because there are ongoing trials which should be included in this study.

| #  | Searches                                                                                                                                                                                                                                                                                                                                                                                                                                                                       | Results |
|----|--------------------------------------------------------------------------------------------------------------------------------------------------------------------------------------------------------------------------------------------------------------------------------------------------------------------------------------------------------------------------------------------------------------------------------------------------------------------------------|---------|
| 1  | "remdesivir"[Supplementary Concept] OR "remdesivir"[All Fields]                                                                                                                                                                                                                                                                                                                                                                                                                | 81      |
| 2  | "viruses/drug effects"[MeSH Terms]                                                                                                                                                                                                                                                                                                                                                                                                                                             | 59,974  |
| 3  | ((("antiviral agents"[Pharmacological Action] OR "antiviral agents"[MeSH Terms]) OR ("antiviral"[All Fields] AND "agents"[All Fields])) OR "antiviral agents"[All Fields]                                                                                                                                                                                                                                                                                                      | 383,998 |
| 4  | "Nucleotide-analogue"[All Fields]                                                                                                                                                                                                                                                                                                                                                                                                                                              | 797     |
| 5  | ((("antiviral agents"[Pharmacological Action] OR "antiviral agents"[MeSH Terms]) OR ("antiviral"[All Fields] AND "agents"[All Fields])) OR "antiviral agents"[All Fields]) OR ("antiviral"[All Fields] AND "drug"[All Fields]) OR "antiviral drug"[All Fields]                                                                                                                                                                                                                 | 392,120 |
| 6  | (((((("antiviral agents"[Pharmacological Action] OR "antiviral agents"[MeSH Terms]) OR ("antiviral"[All Fields] AND "agents"[All Fields])) OR "antiviral agents"[All Fields]) OR ("antiviral"[All Fields] AND "drug"[All Fields])) OR "antiviral drug"[All Fields]) AND "antiviral agents/therapeutic use"[MeSH Terms]                                                                                                                                                         | 98,451  |
| 7  | 1 OR 2 OR 3 OR 4 OR 5 OR 6                                                                                                                                                                                                                                                                                                                                                                                                                                                     | 407,526 |
| 8  | "coronavirus"[MeSH Terms] OR "coronavirus"[All Fields] OR "coronaviruses"[All Fields]                                                                                                                                                                                                                                                                                                                                                                                          | 18,508  |
| 9  | ((("coronavirus"[MeSH Terms] OR "coronavirus"[All Fields]) OR "coronaviruses"[All Fields]) AND "coronavirus infections/virology"[MeSH Major Topic]                                                                                                                                                                                                                                                                                                                             | 1,050   |
| 10 | "covid 19"[Supplementary Concept] OR "covid 19"[All Fields] OR "coronavirus disease 2019"[All Fields]                                                                                                                                                                                                                                                                                                                                                                          | 4,227   |
| 11 | (((((("covid 19"[All Fields] OR "covid 2019"[All Fields]) OR "severe acute respiratory syndrome coronavirus 2"[Supplementary Concept]) OR "severe acute respiratory syndrome coronavirus 2"[All Fields]) OR "2019 ncov"[All Fields]) OR "sars cov 2"[All Fields]) OR "2019ncov"[All Fields]) OR (("wuhan"[All Fields] AND ("coronavirus"[MeSH Terms] OR "coronavirus"[All Fields])) AND (2019/12/1:2019/12/31[Date - Publication] OR 2020/1/1:2020/12/31[Date - Publication])) | 4,656   |
| 12 | "severe acute respiratory syndrome coronavirus 2"[Supplementary Concept] OR "severe acute respiratory syndrome coronavirus 2"[All Fields] OR "2019 novel coronavirus"[All Fields]                                                                                                                                                                                                                                                                                              | 1,429   |

|    |                                                                                                                                                                                                                                                                                                                                                                                                                                                                                                                                                                                                                                                                                                                                                   |         |
|----|---------------------------------------------------------------------------------------------------------------------------------------------------------------------------------------------------------------------------------------------------------------------------------------------------------------------------------------------------------------------------------------------------------------------------------------------------------------------------------------------------------------------------------------------------------------------------------------------------------------------------------------------------------------------------------------------------------------------------------------------------|---------|
| 13 | "severe acute respiratory syndrome coronavirus 2"[Supplementary Concept] OR "severe acute respiratory syndrome coronavirus 2"[All Fields] OR "2019 ncov"[All Fields]                                                                                                                                                                                                                                                                                                                                                                                                                                                                                                                                                                              | 1,465   |
| 14 | "severe acute respiratory syndrome coronavirus 2"[Supplementary Concept] OR "severe acute respiratory syndrome coronavirus 2"[All Fields] OR "sars cov 2"[All Fields]                                                                                                                                                                                                                                                                                                                                                                                                                                                                                                                                                                             | 1,931   |
| 15 | "spike glycoprotein sars cov"[Supplementary Concept]                                                                                                                                                                                                                                                                                                                                                                                                                                                                                                                                                                                                                                                                                              | 452     |
| 16 | (((((("sever"[All Fields] OR "severe"[All Fields]) OR "severed"[All Fields]) OR "severely"[All Fields]) OR "severer"[All Fields]) OR "severes"[All Fields]) OR "severing"[All Fields]) OR "severities"[All Fields]) OR "severity"[All Fields]) OR "severs"[All Fields]) AND (("acute"[All Fields] OR "acutely"[All Fields]) OR "acutes"[All Fields]) AND "respiratory"[All Fields] AND ((((((("syndrom"[All Fields] OR "syndromal"[All Fields]) OR "syndromally"[All Fields]) OR "syndrome"[MeSH Terms]) OR "syndrome"[All Fields]) OR "syndromes"[All Fields]) OR "syndrome s"[All Fields]) OR "syndromic"[All Fields]) OR "syndroms"[All Fields]) AND (("coronavirus"[MeSH Terms] OR "coronavirus"[All Fields]) OR "coronaviruses"[All Fields]) | 4,936   |
| 17 | 8 OR 9 OR 10 OR 11 OR 12 OR 13 OR 14 OR 15 OR 16                                                                                                                                                                                                                                                                                                                                                                                                                                                                                                                                                                                                                                                                                                  | 20,471  |
| 18 | "randomized controlled trial"[Publication Type] OR "randomized controlled trials as topic"[MeSH Terms] OR "randomized controlled trials"[All Fields] OR "randomised controlled trials"[All Fields]                                                                                                                                                                                                                                                                                                                                                                                                                                                                                                                                                | 676,631 |
| 19 | "randomized controlled trials as topic/methods"[MeSH Terms]                                                                                                                                                                                                                                                                                                                                                                                                                                                                                                                                                                                                                                                                                       | 9,652   |
| 20 | "RCTs"[All Fields]                                                                                                                                                                                                                                                                                                                                                                                                                                                                                                                                                                                                                                                                                                                                | 32,846  |
| 21 | 18 OR 19 OR 20                                                                                                                                                                                                                                                                                                                                                                                                                                                                                                                                                                                                                                                                                                                                    | 681,739 |
| 22 | 7 AND 17 AND 21                                                                                                                                                                                                                                                                                                                                                                                                                                                                                                                                                                                                                                                                                                                                   | 18      |
